# Supplementary material
Source: PubMed Central journal article supplement (PMC4244597)
Supplement: supp_mol.114.093666_Supplemental_table_93666.pdf [file supp_mol.114.093666_Supplemental_table_93666.pdf]

## **Supplemental Information**

Krüppel-like factor 9 (KLF9) promotes cytochrome P450 (CYP) 2D6 expression during pregnancy in CYP2D6-humanized mice

Kwihye Koh, Xian Pan, Wei Zhang, Alan Melachlan, Raul Urrutia, Hyunyoung Jeong

Molecular Pharmacology #93666

**Table S1. Sequences of oligonucleotides used in the study**

**Cloning primers for luciferase vectors (mutated sites underlined)**

| Construct       | Forward primer                                  | Reverse primer                                  |
|-----------------|-------------------------------------------------|-------------------------------------------------|
| pGL3-CYP2D6 mK1 | GGGCAAAGGCCATCATCAGCTTTGATTATAAGGGAAGGGTCACGCG  | CGCGTGACCCTTCCCTTATAATCAAAGCTGATGATGGCCTTTGCC   |
| pGL3-CYP2D6 mK2 | GGCCATCATCAGCTCCCTTTATAAGGGATTATTCACGCGCTCGGTGT | ACACCGAGCGCGTGAATAATCCCTTATAAAGGGAGCTGATGATGGCC |
| pGL3-CYP2D6 mK3 | CGCTCGGTGTGCTGAGAGTGAATGCCTGGTCCT               | AGGACCAGGCATTACACTCTCAGCACACCGAGCG              |
| pGL3-CYP2D6 mK4 | CCTCTGTGCCTGGTTTGGTGGGGGTGCC                    | GGCACCCCCACAAACCAGGCACAGAGG                     |
| pGL3-CYP2D6 mK5 | CTCTGTGCCTGGTGGGGTTTATGTGCCAGGTGTGTCCAGA        | TCTGGACACACCTGGCACATAAACCCACCGGCACAGAG          |

**qRT-PCR probes**

| SYBR green probes |         |                       |                         |
|-------------------|---------|-----------------------|-------------------------|
| Mouse gene        | Species | Forward primer        | Reverse primer          |
| <i>Atf5</i>       | Mouse   | TGGGCTGGCTCGTAGACTAT  | GTCATCCAATCAGAGAAGCCG   |
| <i>Egr1</i>       | Mouse   | TCGGCTCCTTCTCACTCA    | CTCATAGGGTTGTTCGCTCGG   |
| <i>Foxa3</i>      | Mouse   | GCGGGCGAGGTGATTCTC    | GAGTGGGTTC AAGGTCATGTAG |
| <i>Id3</i>        | Mouse   | GACGACATGAACCACTGCTAC | CCTGGCTAAGCTGAGTGCC     |
| <i>Junb</i>       | Mouse   | TCACGACGACTCTTACGCAG  | CCTGAGACCCCGATAGGGA     |
| <i>Klf9</i>       | Mouse   | GCCGCCTACATGGACTTCG   | GGTCACCGTTCCTTGGT       |
| <i>Klf10</i>      | Mouse   | AGCTGCGACTGGAAGTCTCA  | CGGAGGTATCAGACACTGGTG   |
| <i>Rev-erba</i>   | Mouse   | ACTTCCCACCATCACCTACTG | GGGAGCTATCATCACTGAGA    |
| <i>β-actin</i>    | Mouse   | GGCTGTATTCCCTCCATCG   | CCAGTTGGTAACAATGCCATGT  |
| <i>Gapdh</i>      | Mouse   | AGGTCGGTGTGAACGGATTG  | TGTAGACCATGTAGTTGAGGTCA |

| Commercial Taqman probes |         |                                    |         |
|--------------------------|---------|------------------------------------|---------|
| Gene                     | Species | Catalog number                     | Company |
| <i>CYP2D6</i>            | Human   | Hs.PT.49a.205234723/ Hs02576167_m1 | IDT/ABI |
| <i>Klf9</i>              | Mouse   | Mm.PT.49a.17256251                 | IDT     |
| <i>Gapdh</i>             | Mouse   | Mm.PT.39a.1                        | IDT     |
| <i>β-actin</i>           | Mouse   | Mm00607939_s1                      | ABI     |

**qPCR probes for ChIP**

| Gene                 | Species | Forward primer         | Reverse primer          | Taqman probe           |
|----------------------|---------|------------------------|-------------------------|------------------------|
| <i>CYP2D6</i>        | Human   | CAACACAGCAGGTTCACT     | CTACCAAATGGGTCCTCT      | AGGCCATCATCAGCTCCCTTTA |
| <i>Apoc2</i>         | Mouse   | CCATGCGTAGGGCATTAGAAGA | GGCCCATCCTGTAACAGAGCTT  |                        |
| <i>Cyp1a1</i>        | Mouse   | GTCGTTGCGCTTCTCACGCGA  | CACTGAGGGAGGGTTGAGG     |                        |
| <i>Hes6</i>          | Mouse   | GGAGTCTGCCCGGCCTAAGTGC | ATTGGCTGTGCGTGGTCCGAGAG |                        |
| <i>CYP2D6 distal</i> | Human   | AGGGAACGACACTCATCACC   | GATACCCCTGCAAGACTCCA    |                        |

**EMSA DNA probes**

|               | Forward primer           | Reverse primer           |
|---------------|--------------------------|--------------------------|
| CYP2D6/K2     | CCTTTATAAGGGAAGGGTCACGCG | CGCGTGACCCTTCCCTTATAAAGG |
| CYP2D6/mK2    | CCTTTATAAGGATTATTCACGCG  | CGCGTGAATAATCCCTTATAAAGG |
| Consensus BTE | AGAGAAGGAGCGTGGCCAACAGA  | TCTGTTGGCCACGCTCCTTCTCT  |

**Table S2.** Genes that are upregulated at G21 (compared to Virgin) and/or downregulated at PP7 (compared to G21) (\* For negative fold change = down-regulated; positive fold change = up-regulated)

| No.                                                           | RefSeq Transcript ID                                                                         | Gene Symbol                               | Gene Title                                                                             | Pattern           | p-value (group) | Fold-Change* (G21/Virgin) | Fold-Change* (PP7/G21) | Fold-Change* (PP7/Virgin) |
|---------------------------------------------------------------|----------------------------------------------------------------------------------------------|-------------------------------------------|----------------------------------------------------------------------------------------|-------------------|-----------------|---------------------------|------------------------|---------------------------|
| <b>Genes that are updated at G21 and downregulated at PP7</b> |                                                                                              |                                           |                                                                                        |                   |                 |                           |                        |                           |
| 1                                                             | NM_001126318 ///<br>NM_026419 ///<br>XM_914439 ///<br>XR_034091 ///<br>XR_034282             | Cela3b ///<br>Gm13011<br>///<br>LOC638418 | chymotrypsin-like elastase family,<br>member 3B /// predicted gene 13011 ///<br>simila | up G21 & down PP7 | 0.00002         | 92.52300                  | -95.23180              | -1.02928                  |
| 2                                                             | NM_026419 ///<br>XM_914439                                                                   | Cela3b ///<br>LOC638418                   | chymotrypsin-like elastase family,<br>member 3B /// similar to elastase 3B,<br>pancrea | up G21 & down PP7 | 0.00005         | 44.43770                  | -42.91710              | 1.03543                   |
| 3                                                             | NM_010915                                                                                    | Klk1b4                                    | kallikrein 1-related peptidase b4                                                      | up G21 & down PP7 | 0.00017         | 32.62190                  | -12.46350              | 2.6174                    |
| 4                                                             | NM_026419                                                                                    | Cela3b                                    | chymotrypsin-like elastase family,<br>member 3B                                        | up G21 & down PP7 | 0.00002         | 20.87770                  | -17.09570              | 1.22123                   |
| 5                                                             | NM_001083929 ///<br>NM_008161                                                                | Gpx3                                      | glutathione peroxidase 3                                                               | up G21 & down PP7 | 0.00070         | 15.76090                  | -10.15390              | 1.5522                    |
| 6                                                             | NM_201640 ///<br>XM_001475399                                                                | Cyp4a31                                   | cytochrome P450, family 4, subfamily a,<br>polypeptide 31                              | up G21 & down PP7 | 0.00349         | 12.16770                  | -2.93002               | 4.15277                   |
| 7                                                             | NM_001111324 ///<br>NM_017464                                                                | Nedd9                                     | neural precursor cell expressed,<br>developmentally down-regulated gene 9              | up G21 & down PP7 | 0.13121         | 6.92718                   | -2.74540               | 2.52319                   |
| 8                                                             | NM_001159555 ///<br>NM_001159556 ///<br>NM_001159557 ///<br>NM_001159558 ///<br>NM_007643    | Cd36                                      | CD36 antigen                                                                           | up G21 & down PP7 | 0.01105         | 6.56232                   | -1.97107               | 3.32932                   |
| 9                                                             | NM_011704                                                                                    | Vnn1                                      | vanin 1                                                                                | up G21 & down PP7 | 0.02950         | 5.87271                   | -7.36795               | -1.25461                  |
| 10                                                            | NM_011267                                                                                    | Rgs16                                     | regulator of G-protein signaling 16                                                    | up G21 & down PP7 | 0.03495         | 5.83684                   | -3.93322               | 1.48399                   |
| 11                                                            | NM_007913                                                                                    | Egr1                                      | early growth response 1                                                                | up G21 & down PP7 | 0.29081         | 5.75685                   | -2.37520               | 2.42374                   |
| 12                                                            | NM_001160378 ///<br>NM_001160379 ///<br>XM_135029 ///<br>XM_918327 ///<br>XM_925654 /// XM_9 | Fam46a                                    | family with sequence similarity 46,<br>member A                                        | up G21 & down PP7 | 0.01853         | 5.68905                   | -1.74399               | 3.26208                   |
| 13                                                            | NM_008730                                                                                    | Nptx1                                     | neuronal pentraxin 1                                                                   | up G21 & down PP7 | 0.14178         | 5.54993                   | -4.57742               | 1.21246                   |
| 14                                                            | NM_007657                                                                                    | Cd9                                       | CD9 antigen                                                                            | up G21 & down PP7 | 0.00443         | 5.18752                   | -2.43438               | 2.13094                   |
| 15                                                            | NM_008817                                                                                    | Peg3                                      | paternally expressed 3                                                                 | up G21 & down PP7 | 0.02317         | 5.03919                   | -2.79539               | 1.80267                   |
| 16                                                            | NM_133185                                                                                    | Rogdi                                     | rogdi homolog (Drosophila)                                                             | up G21 & down PP7 | 0.02092         | 5.01917                   | -3.20538               | 1.56586                   |

| No. | RefSeq Transcript ID          | Gene Symbol                   | Gene Title                                                                       | Pattern           | p-value (group) | Fold-Change* (G21/Virgin) | Fold-Change* (PP7/G21) | Fold-Change* (PP7/Virgin) |
|-----|-------------------------------|-------------------------------|----------------------------------------------------------------------------------|-------------------|-----------------|---------------------------|------------------------|---------------------------|
| 17  | NM_133903                     | Spon2                         | spondin 2, extracellular matrix protein                                          | up G21 & down PP7 | 0.06749         | 4.98912                   | -1.69745               | 2.93919                   |
| 18  | NM_013602                     | Mt1                           | metallothionein 1                                                                | up G21 & down PP7 | 0.03101         | 4.96035                   | -5.54661               | -1.11819                  |
| 19  | NM_007820                     | Cyp3a16                       | cytochrome P450, family 3, subfamily a, polypeptide 16                           | up G21 & down PP7 | 0.00085         | 4.68539                   | -1.49615               | 3.13163                   |
| 20  | NM_011169                     | Prlr                          | prolactin receptor                                                               | up G21 & down PP7 | 0.00115         | 4.36049                   | -3.25334               | 1.34031                   |
| 21  | NM_001029842 ///<br>NM_134038 | Slc16a6                       | solute carrier family 16 (monocarboxylic acid transporters), member 6            | up G21 & down PP7 | 0.15879         | 4.33768                   | -1.91583               | 2.26413                   |
| 22  | NM_008681                     | Ndrp1                         | N-myc downstream regulated gene 1                                                | up G21 & down PP7 | 0.06787         | 4.29101                   | -1.75641               | 2.44305                   |
| 23  | NM_010917                     | Nid1                          | nidogen 1                                                                        | up G21 & down PP7 | 0.01294         | 4.28544                   | -3.50781               | 1.22169                   |
| 24  | NM_007618                     | Serpina6                      | serine (or cysteine) peptidase inhibitor, clade A, member 6                      | up G21 & down PP7 | 0.01277         | 4.16163                   | -2.57513               | 1.61609                   |
| 25  | NM_010114 ///<br>NM_010116    | Klk1b22 ///<br>Klk1b9         | kallikrein 1-related peptidase b22 ///<br>kallikrein 1-related peptidase b9      | up G21 & down PP7 | 0.00167         | 4.02512                   | -3.21485               | 1.25204                   |
| 26  | NM_177420                     | Psat1                         | phosphoserine aminotransferase 1                                                 | up G21 & down PP7 | 0.12595         | 4.00777                   | -2.21124               | 1.81246                   |
| 27  | NM_027237                     | 2010003K1<br>1Rik             | RIKEN cDNA 2010003K11 gene                                                       | up G21 & down PP7 | 0.01633         | 3.86839                   | -2.21298               | 1.74804                   |
| 28  | NM_007763                     | Crip1                         | cysteine-rich protein 1 (intestinal)                                             | up G21 & down PP7 | 0.05363         | 3.72008                   | -3.29548               | 1.12884                   |
| 29  | NM_172053                     | Adamts16                      | a disintegrin-like and metallopeptidase (reprolysin type) with thrombospondin ty | up G21 & down PP7 | 0.00951         | 3.57345                   | -3.35550               | 1.06495                   |
| 30  | NM_011921                     | Aldh1a7                       | aldehyde dehydrogenase family 1, subfamily A7                                    | up G21 & down PP7 | 0.00698         | 3.55899                   | -1.33821               | 2.65951                   |
| 31  | NM_008381 ///<br>XM_001476835 | Inhbb ///<br>LOC100046<br>802 | inhibin beta-B /// similar to Inhbb protein                                      | up G21 & down PP7 | 0.02972         | 3.53558                   | -6.18301               | -1.7488                   |
| 32  | NM_009695                     | Apoc2                         | apolipoprotein C-II                                                              | up G21 & down PP7 | 0.00023         | 3.48893                   | -2.57256               | 1.35621                   |
| 33  | NM_011315                     | Saa3                          | serum amyloid A 3                                                                | up G21 & down PP7 | 0.02424         | 3.43185                   | -3.59394               | -1.04723                  |
| 34  | NM_001163691 ///<br>NM_021415 | Cacna1h                       | calcium channel, voltage-dependent, T type, alpha 1H subunit                     | up G21 & down PP7 | 0.46018         | 3.36997                   | -3.50505               | -1.04008                  |
| 35  | NM_001159650 ///<br>NM_021352 | Crybb3                        | crystallin, beta B3                                                              | up G21 & down PP7 | 0.16596         | 3.36294                   | -3.09776               | 1.0856                    |
| 36  | NM_178739                     | Dcaf12l1                      | DDB1 and CUL4 associated factor 12-like 1                                        | up G21 & down PP7 | 0.03299         | 3.16895                   | -1.67979               | 1.88651                   |
| 37  | NM_144544                     | 2210407C1<br>8Rik             | RIKEN cDNA 2210407C18 gene                                                       | up G21 & down PP7 | 0.00057         | 3.16881                   | -3.27236               | -1.03268                  |
| 38  | NM_013742                     | Cars                          | cysteinyl-tRNA synthetase                                                        | up G21 & down PP7 | 0.00138         | 3.12860                   | -1.70011               | 1.84023                   |
| 39  | NM_008489                     | Lbp                           | lipopolysaccharide binding protein                                               | up G21 & down PP7 | 0.01310         | 3.12680                   | -2.09817               | 1.49025                   |

| No. | RefSeq Transcript ID                              | Gene Symbol | Gene Title                                                                    | Pattern           | p-value (group) | Fold-Change* (G21/Virgin) | Fold-Change* (PP7/G21) | Fold-Change* (PP7/Virgin) |
|-----|---------------------------------------------------|-------------|-------------------------------------------------------------------------------|-------------------|-----------------|---------------------------|------------------------|---------------------------|
| 40  | NM_011242                                         | Rasgrp2     | RAS, guanyl releasing protein 2                                               | up G21 & down PP7 | 0.03834         | 3.04398                   | -1.66493               | 1.8283                    |
| 41  | NM_001136181 ///<br>XM_885191 ///<br>XM_917141    | Hsbp111     | heat shock factor binding protein 1-like 1                                    | up G21 & down PP7 | 0.06876         | 3.03098                   | -2.02392               | 1.49758                   |
| 42  | NM_010060                                         | Dnahc11     | dynein, axonemal, heavy chain 11                                              | up G21 & down PP7 | 0.12670         | 3.01047                   | -2.33859               | 1.2873                    |
| 43  | NM_020013                                         | Fgf21       | fibroblast growth factor 21                                                   | up G21 & down PP7 | 0.00301         | 2.96893                   | -3.33099               | -1.12195                  |
| 44  | NM_013851                                         | Abca8b      | ATP-binding cassette, sub-family A (ABC1), member 8b                          | up G21 & down PP7 | 0.01291         | 2.92594                   | -2.01993               | 1.44854                   |
| 45  | NM_008135                                         | Slc6a9      | solute carrier family 6 (neurotransmitter transporter, glycine), member 9     | up G21 & down PP7 | 0.23899         | 2.90785                   | -2.21416               | 1.31329                   |
| 46  | NM_175138                                         | Dnaic1      | dynein, axonemal, intermediate chain 1                                        | up G21 & down PP7 | 0.01048         | 2.90490                   | -2.89809               | 1.00235                   |
| 47  | NM_011979                                         | Vnn3        | vanin 3                                                                       | up G21 & down PP7 | 0.00025         | 2.89108                   | -2.99114               | -1.03461                  |
| 48  | NM_026095                                         | Snrpd3      | small nuclear ribonucleoprotein D3                                            | up G21 & down PP7 | 0.00018         | 2.84673                   | -1.90584               | 1.49369                   |
| 49  | NM_010172                                         | F7          | coagulation factor VII                                                        | up G21 & down PP7 | 0.00951         | 2.83440                   | -1.61849               | 1.75126                   |
| 50  | NM_009416                                         | Tpm2        | tropomyosin 2, beta                                                           | up G21 & down PP7 | 0.03002         | 2.73555                   | -1.99933               | 1.36823                   |
| 51  | NM_013888                                         | Dnajc12     | DnaJ (Hsp40) homolog, subfamily C, member 12                                  | up G21 & down PP7 | 0.46708         | 2.68956                   | -3.12669               | -1.16253                  |
| 52  | NM_013874                                         | Dpf1        | D4, zinc and double PHD fingers family 1                                      | up G21 & down PP7 | 0.05596         | 2.68710                   | -2.03142               | 1.32277                   |
| 53  | NM_181401                                         | Tmem64      | transmembrane protein 64                                                      | up G21 & down PP7 | 0.23151         | 2.59980                   | -2.12031               | 1.22614                   |
| 54  | NM_001113386 ///<br>NM_013584                     | Lifr        | leukemia inhibitory factor receptor                                           | up G21 & down PP7 | 0.02669         | 2.55655                   | -2.31969               | 1.10211                   |
| 55  | NM_024281 ///<br>NM_133626                        | Rrbp1       | ribosome binding protein 1                                                    | up G21 & down PP7 | 0.01786         | 2.54885                   | -1.72579               | 1.47692                   |
| 56  | NM_001077514 ///<br>NM_001077515 ///<br>NM_011393 | Slc1a2      | solute carrier family 1 (glial high affinity glutamate transporter), member 2 | up G21 & down PP7 | 0.01516         | 2.53303                   | -2.00652               | 1.2624                    |
| 57  | NM_001170959 ///<br>NM_033614                     | Pde6c       | phosphodiesterase 6C, cGMP specific, cone, alpha prime                        | up G21 & down PP7 | 0.06381         | 2.52642                   | -2.50647               | 1.00796                   |
| 58  | NM_012055                                         | Asns        | asparagine synthetase                                                         | up G21 & down PP7 | 0.15433         | 2.47223                   | -2.23344               | 1.10692                   |
| 59  | NM_001136077 ///<br>NM_015744                     | Enpp2       | ectonucleotide pyrophosphatase/phosphodiesterase 2                            | up G21 & down PP7 | 0.00060         | 2.38308                   | -4.77438               | -2.00344                  |
| 60  | NM_133765                                         | Fbxo31      | F-box protein 31                                                              | up G21 & down PP7 | 0.00109         | 2.37834                   | -1.82990               | 1.29971                   |
| 61  | NM_001042611 ///<br>NM_007752                     | Cp          | ceruloplasmin                                                                 | up G21 & down PP7 | 0.00981         | 2.37231                   | -2.41713               | -1.01889                  |
| 62  | NM_013667                                         | Slc22a2     | solute carrier family 22 (organic cation transporter), member 2               | up G21 & down PP7 | 0.27637         | 2.36115                   | -1.96743               | 1.20012                   |
| 63  | NM_028066                                         | F11         | coagulation factor XI                                                         | up G21 & down PP7 | 0.00001         | 2.35869                   | -2.11048               | 1.11761                   |

| No. | RefSeq Transcript ID                                                  | Gene Symbol                                                                                                                                                  | Gene Title                                                                                                            | Pattern           | p-value (group) | Fold-Change* (G21/Virgin) | Fold-Change* (PP7/G21) | Fold-Change* (PP7/Virgin) |
|-----|-----------------------------------------------------------------------|--------------------------------------------------------------------------------------------------------------------------------------------------------------|-----------------------------------------------------------------------------------------------------------------------|-------------------|-----------------|---------------------------|------------------------|---------------------------|
| 64  | NM_001048147 ///<br>NM_001048178 ///<br>NM_010284<br>NM_001033431 /// | Ghr                                                                                                                                                          | growth hormone receptor                                                                                               | up G21 & down PP7 | 0.00368         | 2.34216                   | -2.80673               | -1.19835                  |
| 65  | XM_001476888 ///<br>XM_904112                                         | Nlrp12                                                                                                                                                       | NLR family, pyrin domain containing 12                                                                                | up G21 & down PP7 | 0.00450         | 2.26691                   | -3.17369               | -1.40001                  |
| 66  | NM_175096                                                             | Stbd1                                                                                                                                                        | starch binding domain 1                                                                                               | up G21 & down PP7 | 0.04452         | 2.25060                   | -1.69099               | 1.33094                   |
| 67  | NM_008341                                                             | Igfbp1                                                                                                                                                       | insulin-like growth factor binding protein 1                                                                          | up G21 & down PP7 | 0.19290         | 2.24286                   | -1.96212               | 1.14308                   |
| 68  | NM_028077                                                             | 181005G02Rik                                                                                                                                                 | RIKEN cDNA 181005G02 gene                                                                                             | up G21 & down PP7 | 0.02453         | 2.23610                   | -2.17266               | 1.0292                    |
| 69  | NM_013692                                                             | Klf10                                                                                                                                                        | Kruppel-like factor 10                                                                                                | up G21 & down PP7 | 0.04238         | 2.22874                   | -2.29372               | -1.02915                  |
| 70  | NM_025670                                                             | 5730403B10Rik                                                                                                                                                | RIKEN cDNA 5730403B10 gene                                                                                            | up G21 & down PP7 | 0.00780         | 2.22754                   | -1.74197               | 1.27874                   |
| 71  | NM_010638 ///<br>XM_001479552                                         | Klf9                                                                                                                                                         | Kruppel-like factor 9                                                                                                 | up G21 & down PP7 | 0.03948         | 2.21838                   | -2.05764               | 1.07812                   |
| 72  | NR_002860                                                             | 1200003I10Rik ///<br>1200015M12Rik ///<br>A130040M12Rik ///<br>E430024C06Rik<br>1200015M12Rik ///<br>A130040M12Rik ///<br>E430024C06Rik<br>3930401B19Rik /// | RIKEN cDNA 1200003I10 gene ///<br>RIKEN cDNA 1200015M12 gene ///<br>RIKEN cDNA A130040 gene ///<br>RIKEN cDNA A130040 | up G21 & down PP7 | 0.00508         | 2.21466                   | -1.93114               | 1.14682                   |
| 73  | NR_002860                                                             | 1200015M12Rik ///<br>A130040M12Rik ///<br>E430024C06Rik<br>3930401B19Rik ///                                                                                 | RIKEN cDNA 1200015M12 gene ///<br>RIKEN cDNA A130040M12 gene ///<br>RIKEN cDNA E430024                                | up G21 & down PP7 | 0.00508         | 2.21466                   | -1.93114               | 1.14682                   |
| 74  | NR_002860                                                             | A130040M12Rik ///<br>E430024C06Rik<br>A130040M12Rik                                                                                                          | RIKEN cDNA 3930401B19 gene ///<br>RIKEN cDNA A130040M12 gene ///<br>RIKEN cDNA E430024                                | up G21 & down PP7 | 0.00508         | 2.21466                   | -1.93114               | 1.14682                   |
| 75  | NR_002860                                                             | A130040M12Rik                                                                                                                                                | RIKEN cDNA A130040M12 gene                                                                                            | up G21 & down PP7 | 0.00508         | 2.21466                   | -1.93114               | 1.14682                   |
| 76  | NM_080436                                                             | Rdh1                                                                                                                                                         | retinol dehydrogenase 1 (all trans)                                                                                   | up G21 & down PP7 | 0.39646         | 2.20551                   | -2.19098               | 1.00663                   |
| 77  | NM_178613                                                             | 4933433P14Rik                                                                                                                                                | RIKEN cDNA 4933433P14 gene                                                                                            | up G21 & down PP7 | 0.02544         | 2.14941                   | -1.87090               | 1.14887                   |
| 78  | NM_011338                                                             | Ccl9                                                                                                                                                         | chemokine (C-C motif) ligand 9                                                                                        | up G21 & down PP7 | 0.05841         | 2.11098                   | -1.51604               | 1.39243                   |
| 79  | NM_013834                                                             | Sfrp1                                                                                                                                                        | secreted frizzled-related protein 1                                                                                   | up G21 & down PP7 | 0.00953         | 2.07307                   | -2.00748               | 1.03267                   |
| 80  | NM_008260                                                             | Foxa3                                                                                                                                                        | forkhead box A3                                                                                                       | up G21 & down PP7 | 0.00030         | 2.06809                   | -1.86595               | 1.10833                   |

| No. | RefSeq Transcript ID                                               | Gene Symbol       | Gene Title                                                       | Pattern           | p-value (group) | Fold-Change* (G21/Virgin) | Fold-Change* (PP7/G21) | Fold-Change* (PP7/Virgin) |
|-----|--------------------------------------------------------------------|-------------------|------------------------------------------------------------------|-------------------|-----------------|---------------------------|------------------------|---------------------------|
| 81  | NM_008630                                                          | Mt2               | metallothionein 2                                                | up G21 & down PP7 | 0.00377         | 2.05934                   | -6.93971               | -3.36987                  |
| 82  | NM_177473 ///<br>XM_358773 ///<br>XM_910361                        | Tmem191c          | transmembrane protein 191C                                       | up G21 & down PP7 | 0.00496         | 2.05492                   | -2.22917               | -1.0848                   |
| 83  | NM_007972                                                          | F10               | coagulation factor X                                             | up G21 & down PP7 | 0.00453         | 2.05186                   | -1.37178               | 1.49576                   |
| 84  | NM_013786                                                          | Hsd17b6           | hydroxysteroid (17-beta) dehydrogenase 6                         | up G21 & down PP7 | 0.01123         | 2.05051                   | -2.20632               | -1.07599                  |
| 85  | NM_008963                                                          | Ptgds             | prostaglandin D2 synthase (brain)                                | up G21 & down PP7 | 0.02462         | 2.04987                   | -1.65761               | 1.23664                   |
| 86  | NM_173182                                                          | Fndc3b            | fibronectin type III domain containing 3B                        | up G21 & down PP7 | 0.02357         | 2.04866                   | -1.87989               | 1.08978                   |
| 87  | NM_009252                                                          | Serpina3n         | serine (or cysteine) peptidase inhibitor, clade A, member 3N     | up G21 & down PP7 | 0.00080         | 2.02468                   | -1.59811               | 1.26692                   |
| 88  | NM_153133                                                          | Rdh9              | retinol dehydrogenase 9                                          | up G21 & down PP7 | 0.01896         | 1.97806                   | -3.09008               | -1.56218                  |
| 89  | NM_008491                                                          | Lcn2              | lipocalin 2                                                      | up G21 & down PP7 | 0.28438         | 1.96715                   | -2.37391               | -1.20678                  |
| 90  | NM_194336                                                          | Mpa2l             | macrophage activation 2 like                                     | up G21 & down PP7 | 0.09225         | 1.92768                   | -1.67737               | 1.14923                   |
| 91  | NM_029269                                                          | Spp2              | secreted phosphoprotein 2                                        | up G21 & down PP7 | 0.00110         | 1.91993                   | -1.61817               | 1.18648                   |
| 92  | NM_009014                                                          | Rad51l1           | RAD51-like 1 ( <i>S. cerevisiae</i> )                            | up G21 & down PP7 | 0.44521         | 1.91098                   | -1.63762               | 1.16692                   |
| 93  | NM_010559                                                          | Il6ra             | interleukin 6 receptor, alpha                                    | up G21 & down PP7 | 0.01501         | 1.85350                   | -2.01721               | -1.08833                  |
| 94  | NM_020283                                                          | B3galt1           | UDP-Gal:betaGlcNAc beta 1,3-galactosyltransferase, polypeptide 1 | up G21 & down PP7 | 0.40889         | 1.79532                   | -1.66699               | 1.07698                   |
| 95  | NM_007930                                                          | Enc1              | ectodermal-neural cortex 1                                       | up G21 & down PP7 | 0.01250         | 1.79441                   | -1.97271               | -1.09936                  |
| 96  | NM_007976                                                          | F5                | coagulation factor V                                             | up G21 & down PP7 | 0.01442         | 1.77481                   | -2.16489               | -1.21978                  |
| 97  | NM_027147 ///<br>XM_001473388 ///<br>XM_001478385 ///<br>XM_912979 | Enho              | energy homeostasis associated                                    | up G21 & down PP7 | 0.00486         | 1.76593                   | -1.66080               | 1.0633                    |
| 98  | NR_033510 ///<br>XM_001000061                                      | 1500017E2<br>1Rik | RIKEN cDNA 1500017E21 gene                                       | up G21 & down PP7 | 0.20001         | 1.76134                   | -2.81523               | -1.59834                  |
| 99  | NM_178111                                                          | Trp53inp2         | transformation related protein 53 inducible nuclear protein 2    | up G21 & down PP7 | 0.00728         | 1.75723                   | -1.98955               | -1.13221                  |
| 100 | NM_001034851 ///<br>NM_025459                                      | Fam134b           | family with sequence similarity 134, member B                    | up G21 & down PP7 | 0.03602         | 1.70980                   | -1.61888               | 1.05617                   |
| 101 | NM_001110505 ///<br>NM_007446                                      | Amy1              | amylase 1, salivary                                              | up G21 & down PP7 | 0.00408         | 1.68353                   | -1.51569               | 1.11073                   |
| 102 | NM_001166399 ///<br>NM_009001                                      | Rab3a             | RAB3A, member RAS oncogene family                                | up G21 & down PP7 | 0.00194         | 1.67977                   | -1.68111               | -1.0008                   |
| 103 | NM_025745                                                          | Erlec1            | endoplasmic reticulum lectin 1                                   | up G21 & down PP7 | 0.03408         | 1.66264                   | -1.80484               | -1.08553                  |
| 104 | NM_010217                                                          | Ctgf              | connective tissue growth factor                                  | up G21 & down PP7 | 0.60125         | 1.63829                   | -1.65873               | -1.01248                  |

| No. | RefSeq Transcript ID                                                                           | Gene Symbol                                                                                       | Gene Title                                                                        | Pattern           | p-value (group) | Fold-Change* (G21/Virgin) | Fold-Change* (PP7/G21) | Fold-Change* (PP7/Virgin) |
|-----|------------------------------------------------------------------------------------------------|---------------------------------------------------------------------------------------------------|-----------------------------------------------------------------------------------|-------------------|-----------------|---------------------------|------------------------|---------------------------|
| 105 | NM_009754 ///<br>NM_207680 ///<br>NM_207681                                                    | Bcl2l11                                                                                           | BCL2-like 11 (apoptosis facilitator)                                              | up G21 & down PP7 | 0.03657         | 1.63708                   | -2.19813               | -1.34271                  |
| 106 | NM_001159299 ///<br>NM_018746                                                                  | Itih4                                                                                             | inter alpha-trypsin inhibitor, heavy chain 4                                      | up G21 & down PP7 | 0.00457         | 1.61601                   | -1.41561               | 1.14156                   |
| 107 | NM_027460                                                                                      | Slc25a33                                                                                          | solute carrier family 25, member 33                                               | up G21 & down PP7 | 0.00332         | 1.59995                   | -2.70768               | -1.69236                  |
| 108 | NM_001077184 ///<br>NM_009768                                                                  | Bsg                                                                                               | basigin                                                                           | up G21 & down PP7 | 0.00323         | 1.59229                   | -1.51041               | 1.05421                   |
| 109 | NM_009243 ///<br>NM_009244 ///<br>NM_009245 ///<br>NM_009246 ///<br>NM_009247 ///<br>XR_032407 | LOC100046187 ///<br>Serpina1a ///<br>Serpina1b ///<br>Serpina1c ///<br>Serpina1d ///<br>Serpina1e | similar to Alpha-1-antitrypsin 1-2 precursor (Serine protease inhibitor 1-2) (AI) | up G21 & down PP7 | 0.00558         | 1.52777                   | -2.15334               | -1.40947                  |
| 110 | NM_145594                                                                                      | Fgl1                                                                                              | fibrinogen-like protein 1                                                         | up G21 & down PP7 | 0.00090         | 1.51549                   | -1.47646               | 1.02643                   |
| 111 | NM_001166350 ///<br>NM_199314                                                                  | Serpina11                                                                                         | serine (or cysteine) peptidase inhibitor, clade A (alpha-1 antiproteinase, antit  | up G21 & down PP7 | 0.02369         | 1.50744                   | -2.12381               | -1.40888                  |
| 112 | NM_001136069 ///<br>NM_010699                                                                  | Ldha                                                                                              | lactate dehydrogenase A                                                           | up G21 & down PP7 | 0.00375         | 1.43139                   | -1.42483               | 1.0046                    |
| 113 | NM_011707                                                                                      | Vtn                                                                                               | vitronectin                                                                       | up G21 & down PP7 | 0.01048         | 1.39987                   | -1.51130               | -1.0796                   |
| 114 | NM_009780                                                                                      | C4b                                                                                               | complement component 4B (Childo blood group)                                      | up G21 & down PP7 | 0.02546         | 1.34978                   | -1.36072               | -1.0081                   |
| 115 | NM_008407                                                                                      | Itih3                                                                                             | inter-alpha trypsin inhibitor, heavy chain 3                                      | up G21 & down PP7 | 0.00676         | 1.32786                   | -1.47241               | -1.10886                  |
| 116 | NM_010168                                                                                      | F2                                                                                                | coagulation factor II                                                             | up G21 & down PP7 | 0.00123         | 1.30022                   | -1.26214               | 1.03017                   |
| 117 | NM_027918                                                                                      | 1300017J02Rik                                                                                     | RIKEN cDNA 1300017J02 gene                                                        | up G21 & down PP7 | 0.00021         | 1.27232                   | -1.30834               | -1.02831                  |
| 118 | NM_017370                                                                                      | Hp                                                                                                | haptoglobin                                                                       | up G21 & down PP7 | 0.02415         | 1.23552                   | -1.51509               | -1.22628                  |
| 119 | NM_007686 ///<br>XM_001478214                                                                  | Cfi ///<br>LOC100047470                                                                           | complement component factor i /// similar to complement component factor i        | up G21 & down PP7 | 0.00317         | 1.23494                   | -1.34630               | -1.09017                  |
| 120 | NM_013465                                                                                      | Ahsg                                                                                              | alpha-2-HS-glycoprotein                                                           | up G21 & down PP7 | 0.00432         | 1.17124                   | -1.15545               | 1.01367                   |



| No.                                                          | RefSeq Transcript ID                                                  | Gene Symbol   | Gene Title                                                      | Pattern | p-value (group) | Fold-Change* (G21/Virgin) | Fold-Change* (PP7/G21) | Fold-Change* (PP7/Virgin) |
|--------------------------------------------------------------|-----------------------------------------------------------------------|---------------|-----------------------------------------------------------------|---------|-----------------|---------------------------|------------------------|---------------------------|
| <b>Genes that are updated at G21 or downregulated at PP7</b> |                                                                       |               |                                                                 |         |                 |                           |                        |                           |
| 1                                                            | NM_007809                                                             | Cyp17a1       | cytochrome P450, family 17, subfamily a, polypeptide 1          | up G21  | 0.00219         | 34.31100                  | -1.15121               | 29.8043                   |
| 2                                                            | NM_008553                                                             | Ascl1         | achaete-scute complex homolog 1 (Drosophila)                    | up G21  | 0.37963         | 7.08973                   | -1.33331               | 5.31737                   |
| 3                                                            | NM_025696                                                             | Sorcs3        | sortilin-related VPS10 domain containing receptor 3             | up G21  | 0.12660         | 5.47537                   | -1.61730               | 3.3855                    |
| 4                                                            | NM_178756                                                             | E130309F12Rik | RIKEN cDNA E130309F12 gene                                      | up G21  | 0.00799         | 5.28544                   | -1.24634               | 4.24078                   |
| 5                                                            | NM_177388                                                             | Slc41a2       | solute carrier family 41, member 2                              | up G21  | 0.45403         | 4.37836                   | -1.36617               | 3.20484                   |
| 6                                                            | NM_146260                                                             | Tmie          | transmembrane inner ear                                         | up G21  | 0.02064         | 4.15055                   | -1.48126               | 2.80205                   |
| 7                                                            | NM_026637                                                             | Ggct          | gamma-glutamyl cyclotransferase                                 | up G21  | 0.02948         | 3.62265                   | -1.27787               | 2.83492                   |
| 8                                                            | NM_021481                                                             | Treh          | trehalase (brush-border membrane glycoprotein)                  | up G21  | 0.01070         | 3.43860                   | -1.90061               | 1.80921                   |
| 9                                                            | NM_030693 ///<br>NR_033136                                            | Atf5          | activating transcription factor 5                               | up G21  | 0.00270         | 3.42054                   | -1.33382               | 2.56446                   |
| 10                                                           | NM_020577                                                             | As3mt         | arsenic (+3 oxidation state) methyltransferase                  | up G21  | 0.02385         | 3.40189                   | -1.16070               | 2.93089                   |
| 11                                                           | NM_177343                                                             | Camk1d        | calcium/calmodulin-dependent protein kinase ID                  | up G21  | 0.00389         | 3.15692                   | 1.76018                | 5.55674                   |
| 12                                                           | NM_028270                                                             | Aldh1b1       | aldehyde dehydrogenase 1 family, member B1                      | up G21  | 0.01700         | 2.90649                   | -1.34554               | 2.16008                   |
| 13                                                           | NR_030738 ///<br>XM_001479267 ///<br>XM_001479728<br>NM_001122736 /// | 2410006H16Rik | RIKEN cDNA 2410006H16 gene                                      | up G21  | 0.01672         | 2.89543                   | -1.49321               | 1.93907                   |
| 14                                                           | NM_001122737 ///<br>NM_010514                                         | Igf2          | insulin-like growth factor 2                                    | up G21  | 0.04610         | 2.87389                   | -1.37557               | 2.08923                   |
| 15                                                           | NM_153533                                                             | Tenc1         | tensin like C1 domain-containing phosphatase                    | up G21  | 0.00013         | 2.84365                   | -1.15650               | 2.45884                   |
| 16                                                           | NM_010368                                                             | Gusb          | glucuronidase, beta                                             | up G21  | 0.00748         | 2.78226                   | -1.32801               | 2.09506                   |
| 17                                                           | NM_008655                                                             | Gadd45b       | growth arrest and DNA-damage-inducible 45 beta                  | up G21  | 0.12977         | 2.77714                   | -1.56250               | 1.77736                   |
| 18                                                           | NM_019806                                                             | Vapb          | vesicle-associated membrane protein, associated protein B and C | up G21  | 0.00007         | 2.76114                   | 1.06677                | 2.94551                   |
| 19                                                           | NM_007874                                                             | Reep5         | receptor accessory protein 5                                    | up G21  | 0.00049         | 2.74098                   | -1.05404               | 2.60046                   |
| 20                                                           | NM_145434                                                             | Nr1d1         | nuclear receptor subfamily 1, group D, member 1                 | up G21  | 0.05001         | 2.68653                   | -1.01826               | 2.63836                   |
| 21                                                           | NM_009622                                                             | Adcy1         | adenylate cyclase 1                                             | up G21  | 0.00116         | 2.68446                   | -1.06091               | 2.53034                   |
| 22                                                           | NM_001163028 ///<br>NM_021486                                         | Bcmo1         | beta-carotene 15,15'-monooxygenase                              | up G21  | 0.01544         | 2.67299                   | -1.33237               | 2.00619                   |

| No. | RefSeq Transcript ID                                                                           | Gene Symbol                                     | Gene Title                                                                       | Pattern | p-value (group) | Fold-Change* (G21/Virgin) | Fold-Change* (PP7/G21) | Fold-Change* (PP7/Virgin) |
|-----|------------------------------------------------------------------------------------------------|-------------------------------------------------|----------------------------------------------------------------------------------|---------|-----------------|---------------------------|------------------------|---------------------------|
| 23  | NM_019698 ///<br>NM_153554                                                                     | Aldh18a1                                        | aldehyde dehydrogenase 18 family, member A1                                      | up G21  | 0.10631         | 2.67263                   | 1.93570                | 5.17342                   |
| 24  | NM_183023                                                                                      | Rims4                                           | regulating synaptic membrane exocytosis 4                                        | up G21  | 0.06372         | 2.64593                   | 1.76411                | 4.66771                   |
| 25  | NM_029942                                                                                      | Preli2                                          | PRELI domain containing 2                                                        | up G21  | 0.02593         | 2.64219                   | 1.34153                | 3.54459                   |
| 26  | NM_029083                                                                                      | Ddit4                                           | DNA-damage-inducible transcript 4                                                | up G21  | 0.01590         | 2.62464                   | 1.12220                | 2.94538                   |
| 27  | NM_011405                                                                                      | Slc7a7                                          | solute carrier family 7 (cationic amino acid transporter, y+ system), member 7   | up G21  | 0.05861         | 2.62404                   | -1.60261               | 1.63735                   |
| 28  | NM_009469                                                                                      | Ulk1                                            | Unc-51 like kinase 1 (C. elegans)                                                | up G21  | 0.00408         | 2.62112                   | -1.51108               | 1.7346                    |
| 29  | NM_022325                                                                                      | Ctsz                                            | cathepsin Z                                                                      | up G21  | 0.00037         | 2.62061                   | -1.39030               | 1.88492                   |
| 30  | NM_007634                                                                                      | Ccnf                                            | cyclin F                                                                         | up G21  | 0.19855         | 2.55412                   | -1.05257               | 2.42656                   |
| 31  | NM_010299                                                                                      | Gm2a                                            | GM2 ganglioside activator protein                                                | up G21  | 0.00025         | 2.54886                   | -1.09916               | 2.31892                   |
| 32  | NM_145482                                                                                      | Setd4                                           | SET domain containing 4                                                          | up G21  | 0.01988         | 2.51912                   | 1.26582                | 3.18876                   |
| 33  | NM_013769                                                                                      | Tjp3                                            | tight junction protein 3                                                         | up G21  | 0.01507         | 2.50233                   | 2.06742                | 5.17338                   |
| 34  | NM_016966 ///<br>XR_030810 ///<br>XR_030923 ///<br>XR_031967 ///<br>XR_032429 ///<br>XR_034648 | Gm7669 ///<br>Gm7901 ///<br>Gm9347 ///<br>Phgdh | 3-phosphoglycerate dehydrogenase pseudogene /// 3-phosphoglycerate dehydrogenase | up G21  | 0.09869         | 2.49378                   | -1.69947               | 1.46738                   |
| 35  | NM_029413                                                                                      | Morc4                                           | microrchidia 4                                                                   | up G21  | 0.03695         | 2.48710                   | -1.17663               | 2.11375                   |
| 36  | NM_009205                                                                                      | Slc3a1                                          | solute carrier family 3, member 1                                                | up G21  | 0.00931         | 2.48500                   | 1.04684                | 2.60139                   |
| 37  | NM_001037221 ///<br>NM_001163433 ///<br>NM_028966                                              | Samd4                                           | sterile alpha motif domain containing 4                                          | up G21  | 0.00240         | 2.47160                   | -1.35118               | 1.82921                   |
| 38  | NM_007418                                                                                      | Adra2c                                          | adrenergic receptor, alpha 2c                                                    | up G21  | 0.07824         | 2.46875                   | -1.72553               | 1.43072                   |
| 39  | NM_144855 ///<br>NM_178224                                                                     | Cbs                                             | cystathionine beta-synthase                                                      | up G21  | 0.00933         | 2.45893                   | 1.18839                | 2.92218                   |
| 40  | NM_133214                                                                                      | BC017612                                        | cDNA sequence BC017612                                                           | up G21  | 0.06049         | 2.44607                   | -1.26590               | 1.93228                   |
| 41  | NM_010421                                                                                      | Hexa                                            | hexosaminidase A                                                                 | up G21  | 0.00464         | 2.43783                   | -1.36389               | 1.78741                   |
| 42  | NR_001463 ///<br>NR_001570                                                                     | Xist                                            | inactive X specific transcripts                                                  | up G21  | 0.02508         | 2.40332                   | 1.14853                | 2.76029                   |
| 43  | NM_001130184 ///<br>NM_001130185 ///<br>NM_001130186 ///<br>NM_172303                          | Phf17                                           | PHD finger protein 17                                                            | up G21  | 0.00417         | 2.38687                   | 1.08975                | 2.6011                    |
| 44  | NM_024169                                                                                      | Fkbp11                                          | FK506 binding protein 11                                                         | up G21  | 0.12502         | 2.37856                   | -1.37966               | 1.72402                   |
| 45  | NM_011415                                                                                      | Snai2                                           | snail homolog 2 (Drosophila)                                                     | up G21  | 0.06160         | 2.36659                   | -1.33350               | 1.77471                   |

| No. | RefSeq Transcript ID                                                                         | Gene Symbol                                                                  | Gene Title                                                                             | Pattern | p-value (group) | Fold-Change* (G21/Virgin) | Fold-Change* (PP7/G21) | Fold-Change* (PP7/Virgin) |
|-----|----------------------------------------------------------------------------------------------|------------------------------------------------------------------------------|----------------------------------------------------------------------------------------|---------|-----------------|---------------------------|------------------------|---------------------------|
| 46  | NM_010359                                                                                    | Gstm3                                                                        | glutathione S-transferase, mu 3                                                        | up G21  | 0.00306         | 2.35131                   | 1.77158                | 4.16553                   |
| 47  | NM_026947                                                                                    | 1810022C2<br>3Rik                                                            | RIKEN cDNA 1810022C23 gene                                                             | up G21  | 0.00186         | 2.34569                   | 3.01165                | 7.06441                   |
| 48  | NM_001139511 ///<br>NM_001139512 ///<br>NM_001139513 ///<br>NM_023130                        | Raly                                                                         | hnRNP-associated with lethal yellow                                                    | up G21  | 0.00330         | 2.33438                   | 1.14290                | 2.66796                   |
| 49  | NM_172442                                                                                    | Dtx4                                                                         | deltex 4 homolog (Drosophila)                                                          | up G21  | 0.02195         | 2.33039                   | -1.12260               | 2.07588                   |
| 50  | NM_009434                                                                                    | Phlda2                                                                       | pleckstrin homology-like domain, family A, member 2                                    | up G21  | 0.02810         | 2.32677                   | -1.11575               | 2.08537                   |
| 51  | NM_001033178 ///<br>NM_001045538 ///<br>NR_028305 ///<br>NR_028306 ///<br>NR_033520 /// XR_0 | Tmem181a<br>///<br>Tmem181b<br>///<br>Tmem181c-<br>ps ///<br>Tmem181d-<br>ps | transmembrane protein 181A ///<br>transmembrane protein 181B ///<br>transmembrane prot | up G21  | 0.01751         | 2.31343                   | -1.18707               | 1.94886                   |
| 52  | NM_144893                                                                                    | Slc35c2                                                                      | solute carrier family 35, member C2                                                    | up G21  | 0.00430         | 2.30759                   | 1.01229                | 2.33596                   |
| 53  | NM_009731                                                                                    | Akr1b7                                                                       | aldo-keto reductase family 1, member B7                                                | up G21  | 0.01097         | 2.29611                   | 2.30690                | 5.29689                   |
| 54  | NM_183257                                                                                    | Hamp2                                                                        | hepcidin antimicrobial peptide 2                                                       | up G21  | 0.01084         | 2.28888                   | -1.13791               | 2.01147                   |
| 55  | NM_029310                                                                                    | Fabp12                                                                       | fatty acid binding protein 12                                                          | up G21  | 0.00199         | 2.28327                   | 1.60160                | 3.65689                   |
| 56  | NM_029021                                                                                    | 4833422F2<br>4Rik                                                            | RIKEN cDNA 4833422F24 gene                                                             | up G21  | 0.00117         | 2.27708                   | -1.62093               | 1.4048                    |
| 57  | NM_172301                                                                                    | Ccnb1                                                                        | cyclin B1                                                                              | up G21  | 0.14712         | 2.27617                   | 2.47508                | 5.63371                   |
| 58  | NM_001039509 ///<br>NM_019999 ///<br>NM_025580                                               | Pnkd                                                                         | paroxysmal nonkinesinogenic dyskinesia                                                 | up G21  | 0.11143         | 2.27035                   | 1.22223                | 2.7749                    |
| 59  | NM_144795                                                                                    | Pycr1                                                                        | pyrroline-5-carboxylate reductase 1                                                    | up G21  | 0.07057         | 2.26069                   | -1.63020               | 1.38675                   |
| 60  | NM_001001179                                                                                 | BC048546                                                                     | cDNA sequence BC048546                                                                 | up G21  | 0.01015         | 2.24105                   | -1.26455               | 1.77221                   |
| 61  | NM_177855 ///<br>XM_887994                                                                   | Med12l                                                                       | mediator of RNA polymerase II transcription, subunit 12 homolog (yeast)-like           | up G21  | 0.00798         | 2.23595                   | -1.20267               | 1.85915                   |
| 62  | NM_013476                                                                                    | Ar                                                                           | androgen receptor                                                                      | up G21  | 0.00960         | 2.23455                   | 1.54817                | 3.45947                   |
| 63  | NM_016974                                                                                    | Dbp                                                                          | D site albumin promoter binding protein                                                | up G21  | 0.25884         | 2.22934                   | -1.16722               | 1.90996                   |
| 64  | NM_001142968 ///<br>XR_035100 ///<br>XR_035103                                               | BC024139                                                                     | cDNA sequence BC024139                                                                 | up G21  | 0.01430         | 2.21896                   | -1.39086               | 1.59539                   |
| 65  | NM_011708                                                                                    | Vwf                                                                          | Von Willebrand factor homolog                                                          | up G21  | 0.28282         | 2.21303                   | -1.60086               | 1.3824                    |
| 66  | NM_026501 ///<br>NM_028933                                                                   | Fam134c                                                                      | family with sequence similarity 134, member C                                          | up G21  | 0.01316         | 2.20685                   | -1.29460               | 1.70466                   |

| No. | RefSeq Transcript ID                                                                           | Gene Symbol                                                                                                                                | Gene Title                                                                       | Pattern | p-value (group) | Fold-Change* (G21/Virgin) | Fold-Change* (PP7/G21) | Fold-Change* (PP7/Virgin) |
|-----|------------------------------------------------------------------------------------------------|--------------------------------------------------------------------------------------------------------------------------------------------|----------------------------------------------------------------------------------|---------|-----------------|---------------------------|------------------------|---------------------------|
| 67  | NM_001162492 ///<br>NM_001162493 ///<br>NM_138670                                              | Mpst                                                                                                                                       | mercaptopyruvate sulfurtransferase                                               | up G21  | 0.00264         | 2.20389                   | 1.31178                | 2.89103                   |
| 68  | NM_001038492 ///<br>NM_008906                                                                  | Ctsa                                                                                                                                       | cathepsin A                                                                      | up G21  | 0.00400         | 2.20202                   | -1.36174               | 1.61706                   |
| 69  | NM_175687                                                                                      | A230050P2<br>ORik                                                                                                                          | RIKEN cDNA A230050P20 gene                                                       | up G21  | 0.00401         | 2.20070                   | 1.07904                | 2.37465                   |
| 70  | NM_007630                                                                                      | Ccnb2                                                                                                                                      | cyclin B2                                                                        | up G21  | 0.12097         | 2.19798                   | 3.63989                | 8.00039                   |
| 71  | NM_030187 ///<br>XM_911194 ///<br>XM_994344                                                    | Ak7                                                                                                                                        | adenylate kinase 7                                                               | up G21  | 0.04714         | 2.19468                   | -1.05200               | 2.08621                   |
| 72  | NM_146093                                                                                      | Ubxn1                                                                                                                                      | UBX domain protein 1                                                             | up G21  | 0.02851         | 2.18945                   | -1.13681               | 1.92596                   |
| 73  | NM_177900                                                                                      | Hapln4                                                                                                                                     | hyaluronan and proteoglycan link protein 4                                       | up G21  | 0.10389         | 2.18821                   | 1.05681                | 2.31251                   |
| 74  | NM_001081196 ///<br>XM_001477687                                                               | Hnrnpul2                                                                                                                                   | heterogeneous nuclear ribonucleoprotein U-like 2                                 | up G21  | 0.00128         | 2.18760                   | 1.12406                | 2.45899                   |
| 75  | NM_029809                                                                                      | 2310014L1<br>7Rik                                                                                                                          | RIKEN cDNA 2310014L17 gene                                                       | up G21  | 0.00030         | 2.18614                   | -1.42014               | 1.53938                   |
| 76  | NM_053014                                                                                      | Agpat3                                                                                                                                     | 1-acylglycerol-3-phosphate O-acyltransferase 3                                   | up G21  | 0.00045         | 2.18573                   | -1.12832               | 1.93716                   |
| 77  | NM_001081212                                                                                   | Irs2                                                                                                                                       | insulin receptor substrate 2                                                     | up G21  | 0.06887         | 2.18144                   | -1.09428               | 1.99349                   |
| 78  | NM_001039655 ///<br>NM_011245                                                                  | Rasgrf1                                                                                                                                    | RAS protein-specific guanine nucleotide-releasing factor 1                       | up G21  | 0.05917         | 2.16895                   | -1.28690               | 1.6854                    |
| 79  | NM_181748                                                                                      | Gpr120                                                                                                                                     | G protein-coupled receptor 120                                                   | up G21  | 0.00271         | 2.16299                   | -1.39695               | 1.54837                   |
| 80  | NM_134188                                                                                      | Acot2                                                                                                                                      | acyl-CoA thioesterase 2                                                          | up G21  | 0.12962         | 2.16181                   | -1.32086               | 1.63666                   |
| 81  | NM_009331                                                                                      | Tcf7                                                                                                                                       | transcription factor 7, T-cell specific                                          | up G21  | 0.00901         | 2.15566                   | -1.10324               | 1.95393                   |
| 82  | NM_026959                                                                                      | Stx18                                                                                                                                      | syntaxin 18                                                                      | up G21  | 0.25839         | 2.14405                   | -1.25599               | 1.70706                   |
| 83  | NM_133779                                                                                      | Pigt                                                                                                                                       | phosphatidylinositol glycan anchor biosynthesis, class T                         | up G21  | 0.02190         | 2.14321                   | 1.10662                | 2.37172                   |
| 84  | NM_016966 ///<br>XR_001608 ///<br>XR_001935 ///<br>XR_030502 ///<br>XR_030672 ///<br>XR_030810 | Gm13337<br>/// Gm5847<br>/// Gm6756<br>/// Gm7669<br>/// Gm7901<br>/// Gm8341<br>/// Gm9210<br>/// Gm9347<br>///<br>LOC630896<br>/// Phgdh | 3-phosphoglycerate dehydrogenase pseudogene /// 3-phosphoglycerate dehydrogenase | up G21  | 0.17286         | 2.12909                   | -1.78443               | 1.19315                   |
| 85  | NM_008509                                                                                      | Lpl                                                                                                                                        | lipoprotein lipase                                                               | up G21  | 0.01919         | 2.12785                   | 1.10837                | 2.35845                   |
| 86  | NM_133191                                                                                      | Eps8l2                                                                                                                                     | EPS8-like 2                                                                      | up G21  | 0.10031         | 2.12409                   | 1.04302                | 2.21547                   |

| No. | RefSeq Transcript ID                              | Gene Symbol       | Gene Title                                                         | Pattern | p-value (group) | Fold-Change* (G21/Virgin) | Fold-Change* (PP7/G21) | Fold-Change* (PP7/Virgin) |
|-----|---------------------------------------------------|-------------------|--------------------------------------------------------------------|---------|-----------------|---------------------------|------------------------|---------------------------|
| 87  | NM_178661                                         | Creb3l2           | cAMP responsive element binding protein 3-like 2                   | up G21  | 0.18516         | 2.12212                   | -1.01489               | 2.09098                   |
| 88  | NM_024223                                         | Crip2             | cysteine rich protein 2                                            | up G21  | 0.00966         | 2.10320                   | -1.00331               | 2.09625                   |
| 89  | NM_133979                                         | Ano10             | anoctamin 10                                                       | up G21  | 0.00533         | 2.10016                   | -1.27184               | 1.65128                   |
| 90  | NM_001161746 ///<br>NM_013749                     | Tnfrsf12a         | tumor necrosis factor receptor superfamily, member 12a             | up G21  | 0.07555         | 2.09746                   | -1.15762               | 1.81187                   |
| 91  | NM_029609                                         | Lhpp              | phospholysine phosphohistidine inorganic pyrophosphate phosphatase | up G21  | 0.04597         | 2.09697                   | -1.24277               | 1.68734                   |
| 92  | NM_021319                                         | Pglyrp2           | peptidoglycan recognition protein 2                                | up G21  | 0.00305         | 2.09666                   | -1.11643               | 1.87801                   |
| 93  | NM_008416                                         | Junb              | Jun-B oncogene                                                     | up G21  | 0.19129         | 2.08824                   | -1.55102               | 1.34637                   |
| 94  | NM_178924                                         | Upk1b             | uropod protein 1B                                                  | up G21  | 0.12215         | 2.08510                   | -1.48126               | 1.40766                   |
| 95  | NM_001161667 ///<br>NM_053115                     | Acox2             | acyl-Coenzyme A oxidase 2, branched chain                          | up G21  | 0.02188         | 2.08360                   | -1.49454               | 1.39414                   |
| 96  | NM_001081756 ///<br>NM_172484 ///<br>NM_176957    | Nckap5            | NCK-associated protein 5                                           | up G21  | 0.09429         | 2.07546                   | 1.14321                | 2.37268                   |
| 97  | NM_145447                                         | Mfsd7c            | major facilitator superfamily domain containing 7C                 | up G21  | 0.21157         | 2.06855                   | -1.34216               | 1.54121                   |
| 98  | NM_145564                                         | Fbxo21            | F-box protein 21                                                   | up G21  | 0.02687         | 2.06051                   | -1.30761               | 1.57579                   |
| 99  | NM_010687                                         | Large             | like-glycosyltransferase                                           | up G21  | 0.00358         | 2.05313                   | -1.26513               | 1.62286                   |
| 100 | NM_025563                                         | 2010012O0<br>5Rik | RIKEN cDNA 2010012O05 gene                                         | up G21  | 0.00297         | 2.04939                   | -1.04852               | 1.95455                   |
| 101 | NM_010422                                         | Hexb              | hexosaminidase B                                                   | up G21  | 0.01573         | 2.04766                   | -1.18079               | 1.73415                   |
| 102 | NR_030703                                         | Snord104          | small nucleolar RNA, C/D box 104                                   | up G21  | 0.02791         | 2.04349                   | -1.46803               | 1.392                     |
| 103 | NM_025662 ///<br>NM_178016                        | Pigk              | phosphatidylinositol glycan anchor biosynthesis, class K           | up G21  | 0.00158         | 2.04241                   | 1.05450                | 2.15372                   |
| 104 | NM_010012                                         | Cyp8b1            | cytochrome P450, family 8, subfamily b, polypeptide 1              | up G21  | 0.01404         | 2.03097                   | 1.35499                | 2.75196                   |
| 105 | NM_019447                                         | Hgfac             | hepatocyte growth factor activator                                 | up G21  | 0.00280         | 2.03002                   | -1.20248               | 1.68819                   |
| 106 | NM_001025613 ///<br>NM_001025614                  | Otud7b            | OTU domain containing 7B                                           | up G21  | 0.00473         | 2.02824                   | 1.10718                | 2.24562                   |
| 107 | NM_010198                                         | Fgf11             | fibroblast growth factor 11                                        | up G21  | 0.33070         | 2.02673                   | -1.75364               | 1.15573                   |
| 108 | NM_009698                                         | Aprt              | adenine phosphoribosyl transferase                                 | up G21  | 0.12120         | 2.01681                   | -1.21857               | 1.65506                   |
| 109 | NM_025638                                         | Gdpd1             | glycerophosphodiester phosphodiesterase domain containing 1        | up G21  | 0.00459         | 2.01572                   | -1.13703               | 1.7728                    |
| 110 | NM_001039701 ///<br>NM_001159562 ///<br>NM_031167 | Il1rn             | interleukin 1 receptor antagonist                                  | up G21  | 0.23924         | 2.01343                   | -1.91438               | 1.05174                   |

| No. | RefSeq Transcript ID                                                                         | Gene Symbol | Gene Title                                                                   | Pattern | p-value (group) | Fold-Change* (G21/Virgin) | Fold-Change* (PP7/G21) | Fold-Change* (PP7/Virgin) |
|-----|----------------------------------------------------------------------------------------------|-------------|------------------------------------------------------------------------------|---------|-----------------|---------------------------|------------------------|---------------------------|
| 111 | NM_001081213                                                                                 | Ermp1       | endoplasmic reticulum metallopeptidase 1                                     | up G21  | 0.03548         | 2.01229                   | -1.65669               | 1.21464                   |
| 112 | NM_175093                                                                                    | Trib3       | tribbles homolog 3 (Drosophila)                                              | up G21  | 0.26904         | 1.99986                   | -1.39706               | 1.43148                   |
| 113 | NM_133974                                                                                    | Cdcp1       | CUB domain containing protein 1                                              | up G21  | 0.06060         | 1.99475                   | -1.15527               | 1.72664                   |
| 114 | NM_153782                                                                                    | Fam20a      | family with sequence similarity 20, member A                                 | up G21  | 0.00331         | 1.99167                   | -1.13348               | 1.75712                   |
| 115 | NM_010271                                                                                    | Gpd1        | glycerol-3-phosphate dehydrogenase 1 (soluble)                               | up G21  | 0.00288         | 1.99079                   | 1.02092                | 2.03244                   |
| 116 | NM_053195                                                                                    | Slc24a3     | solute carrier family 24 (sodium/potassium/calcium exchanger), member 3      | up G21  | 0.12727         | 1.98960                   | -1.63757               | 1.21497                   |
| 117 | NM_145384                                                                                    | Pqlc2       | PQ loop repeat containing 2                                                  | up G21  | 0.01618         | 1.98356                   | -1.37834               | 1.43909                   |
| 118 | NM_001177833 ///<br>NM_001177834 ///<br>NM_001177835 ///<br>NM_001177836 ///<br>NM_001177837 | Smox        | spermine oxidase                                                             | up G21  | 0.08675         | 1.98237                   | -1.31404               | 1.50861                   |
| 119 | NM_018887                                                                                    | Cyp39a1     | cytochrome P450, family 39, subfamily a, polypeptide 1                       | up G21  | 0.00529         | 1.97605                   | 1.54703                | 3.057                     |
| 120 | NM_172702                                                                                    | Serinc2     | serine incorporator 2                                                        | up G21  | 0.08231         | 1.97517                   | -1.05132               | 1.87876                   |
| 121 | NM_177380                                                                                    | Cyp3a44     | cytochrome P450, family 3, subfamily a, polypeptide 44                       | up G21  | 0.00018         | 1.97401                   | 1.18540                | 2.33999                   |
| 122 | NM_001080940<br>NM_001163704 ///<br>NM_001163705 ///                                         | Gm6484      | predicted gene 6484                                                          | up G21  | 0.26611         | 1.97367                   | 1.21712                | 2.4022                    |
| 123 | NM_001163706 ///<br>NM_001163707 ///<br>NM_015797                                            | Fbxo6       | F-box protein 6                                                              | up G21  | 0.04972         | 1.97294                   | -1.37983               | 1.42984                   |
| 124 | NM_013731<br>NM_001163440 ///                                                                | Sgk2        | serum/glucocorticoid regulated kinase 2                                      | up G21  | 0.01661         | 1.97111                   | 1.83175                | 3.61058                   |
| 125 | NM_001163441 ///<br>NM_008619                                                                | Mov10       | Moloney leukemia virus 10                                                    | up G21  | 0.00077         | 1.97024                   | -1.09507               | 1.79919                   |
| 126 | NM_018861                                                                                    | Slc1a4      | solute carrier family 1 (glutamate/neutral amino acid transporter), member 4 | up G21  | 0.00313         | 1.96254                   | -1.12785               | 1.74007                   |
| 127 | NM_001159324 ///<br>NM_008064                                                                | Gaa         | glucosidase, alpha, acid                                                     | up G21  | 0.01154         | 1.95792                   | 1.05040                | 2.0566                    |
| 128 | NM_001035854 ///<br>NM_027915                                                                | Ap2b1       | adaptor-related protein complex 2, beta 1 subunit                            | up G21  | 0.00094         | 1.95476                   | 1.15562                | 2.25896                   |
| 129 | NM_001166177 ///<br>NM_028710                                                                | Arsg        | arylsulfatase G                                                              | up G21  | 0.08032         | 1.95421                   | -1.30422               | 1.49838                   |
| 130 | NM_008608                                                                                    | Mmp14       | matrix metallopeptidase 14 (membrane-inserted)                               | up G21  | 0.00889         | 1.95081                   | -1.17779               | 1.65633                   |

| No. | RefSeq Transcript ID                              | Gene Symbol              | Gene Title                                                                         | Pattern | p-value (group) | Fold-Change* (G21/Virgin) | Fold-Change* (PP7/G21) | Fold-Change* (PP7/Virgin) |
|-----|---------------------------------------------------|--------------------------|------------------------------------------------------------------------------------|---------|-----------------|---------------------------|------------------------|---------------------------|
| 131 | NM_001081454 ///<br>NM_011046                     | Furin                    | furin (paired basic amino acid cleaving enzyme)                                    | up G21  | 0.01460         | 1.94845                   | -1.41774               | 1.37433                   |
| 132 | NM_019578                                         | Extl1                    | exostoses (multiple)-like 1                                                        | up G21  | 0.02346         | 1.94829                   | -1.24380               | 1.5664                    |
| 133 | NM_001042674 ///<br>NM_001042675 ///<br>NM_019733 | Rbpms                    | RNA binding protein gene with multiple splicing                                    | up G21  | 0.02239         | 1.94166                   | -1.40532               | 1.38164                   |
| 134 | NM_001110162 ///<br>NM_175384                     | Cdca2                    | cell division cycle associated 2                                                   | up G21  | 0.07835         | 1.93883                   | -1.08959               | 1.77941                   |
| 135 | NM_028733 ///<br>NM_030880                        | Pacsin3                  | protein kinase C and casein kinase substrate in neurons 3                          | up G21  | 0.00425         | 1.93856                   | -1.23324               | 1.57192                   |
| 136 | NM_008638                                         | Mthfd2                   | methylenetetrahydrofolate dehydrogenase (NAD+ dependent), methenyltetrahydrofolate | up G21  | 0.15148         | 1.93172                   | -2.02939               | -1.05056                  |
| 137 | NM_008486                                         | Anpep                    | alanyl (membrane) aminopeptidase                                                   | up G21  | 0.01147         | 1.92961                   | -1.52522               | 1.26513                   |
| 138 | NM_009539                                         | Zap70                    | zeta-chain (TCR) associated protein kinase                                         | up G21  | 0.04931         | 1.92796                   | -1.40298               | 1.37419                   |
| 139 | NM_011832                                         | Insrr                    | insulin receptor-related receptor                                                  | up G21  | 0.09336         | 1.92739                   | -2.04082               | -1.05885                  |
| 140 | NM_001114339 ///<br>NM_023792                     | Pank1                    | pantothenate kinase 1                                                              | up G21  | 0.17114         | 1.92736                   | -1.71474               | 1.124                     |
| 141 | NM_146125                                         | Itpka                    | inositol 1,4,5-trisphosphate 3-kinase A                                            | up G21  | 0.00412         | 1.91875                   | 1.02917                | 1.97472                   |
| 142 | NM_001177576 ///<br>NM_026646                     | Slc25a22                 | solute carrier family 25 (mitochondrial carrier, glutamate), member 22             | up G21  | 0.02690         | 1.91627                   | -1.02025               | 1.87824                   |
| 143 | NM_001033178 ///<br>NM_001045538 ///<br>NR_033520 | Tmem181a ///<br>Tmem181b | transmembrane protein 181A ///<br>transmembrane protein 181B                       | up G21  | 0.04596         | 1.91057                   | -1.07597               | 1.77567                   |
| 144 | NM_172785                                         | Zc3h12d                  | zinc finger CCCH type containing 12D                                               | up G21  | 0.10786         | 1.90660                   | -1.52751               | 1.24818                   |
| 145 | NM_213729                                         | Inca1                    | inhibitor of CDK, cyclin A1 interacting protein 1                                  | up G21  | 0.03173         | 1.90540                   | -1.21562               | 1.56744                   |
| 146 | NM_172884                                         | 2900026A02Rik            | RIKEN cDNA 2900026A02 gene                                                         | up G21  | 0.02029         | 1.90373                   | 1.11259                | 2.11808                   |
| 147 | NM_012052                                         | Rps3                     | ribosomal protein S3                                                               | up G21  | 0.12050         | 1.90279                   | -1.95418               | -1.02701                  |
| 148 | NM_026609                                         | Leprotl1                 | leptin receptor overlapping transcript-like 1                                      | up G21  | 0.02877         | 1.89780                   | -1.28397               | 1.47807                   |
| 149 | NM_011565                                         | Tead2                    | TEA domain family member 2                                                         | up G21  | 0.00061         | 1.89426                   | -1.43175               | 1.32304                   |
| 150 | NM_153136                                         | Nudt18                   | nudix (nucleoside diphosphate linked moiety X)-type motif 18                       | up G21  | 0.01635         | 1.89294                   | -1.24059               | 1.52584                   |
| 151 | NM_145449                                         | Ifi2712b                 | interferon, alpha-inducible protein 27 like 2B                                     | up G21  | 0.00451         | 1.89207                   | -1.29179               | 1.46469                   |
| 152 | NM_133994                                         | Gstt3                    | glutathione S-transferase, theta 3                                                 | up G21  | 0.03217         | 1.89028                   | 1.00609                | 1.9018                    |
| 153 | NM_001043228 ///<br>NM_009345                     | Dntt                     | deoxynucleotidyltransferase, terminal                                              | up G21  | 0.01076         | 1.88888                   | 2.26456                | 4.27749                   |

| No. | RefSeq Transcript ID                                         | Gene Symbol | Gene Title                                                                     | Pattern | p-value (group) | Fold-Change* (G21/Virgin) | Fold-Change* (PP7/G21) | Fold-Change* (PP7/Virgin) |
|-----|--------------------------------------------------------------|-------------|--------------------------------------------------------------------------------|---------|-----------------|---------------------------|------------------------|---------------------------|
| 154 | NR_002853 ///<br>NR_027772 ///<br>NR_027773 ///<br>NR_027784 | Airn        | antisense Igf2r RNA                                                            | up G21  | 0.04034         | 1.88654                   | 1.12681                | 2.12577                   |
| 155 | NM_146190                                                    | Tubgcp5     | Tubulin, gamma complex associated protein 5                                    | up G21  | 0.18723         | 1.88130                   | -1.61204               | 1.16703                   |
| 156 | NM_009180                                                    | St6galnac2  | ST6 (alpha-N-acetyl-neuraminy-2,3-beta-galactosyl-1,3)-N-acetylgalactosaminide | up G21  | 0.04812         | 1.88033                   | -1.44717               | 1.29931                   |
| 157 | NM_009932                                                    | Col4a2      | collagen, type IV, alpha 2                                                     | up G21  | 0.01327         | 1.87561                   | -1.53372               | 1.22292                   |
| 158 | NM_146173                                                    | Tspan33     | tetraspanin 33                                                                 | up G21  | 0.11177         | 1.87476                   | -1.24296               | 1.50831                   |
| 159 | NM_019781                                                    | Pex14       | peroxisomal biogenesis factor 14                                               | up G21  | 0.00255         | 1.87219                   | -1.26271               | 1.48268                   |
| 160 | NM_172397                                                    | Limd2       | LIM domain containing 2                                                        | up G21  | 0.02630         | 1.87215                   | 1.12129                | 2.09922                   |
| 161 | NM_001166406 ///<br>NM_001166407 ///<br>NM_009004            | Kif20a      | kinesin family member 20A                                                      | up G21  | 0.14704         | 1.86994                   | 2.26109                | 4.22809                   |
| 162 | NM_145940                                                    | Wipi1       | WD repeat domain, phosphoinositide interacting 1                               | up G21  | 0.00945         | 1.86928                   | -1.05130               | 1.77805                   |
| 163 | NM_173371                                                    | H6pd        | hexose-6-phosphate dehydrogenase (glucose 1-dehydrogenase)                     | up G21  | 0.00111         | 1.86562                   | -1.32540               | 1.40759                   |
| 164 | NM_001081349 ///<br>NM_001083809 ///<br>NM_024497            | Slc43a1     | solute carrier family 43, member 1                                             | up G21  | 0.23686         | 1.86519                   | -1.50298               | 1.24099                   |
| 165 | NM_172404                                                    | Ccb1        | cysteine conjugate-beta lyase 1                                                | up G21  | 0.03311         | 1.86255                   | -1.06734               | 1.74504                   |
| 166 | NM_023627                                                    | Isyna1      | myo-inositol 1-phosphate synthase A1                                           | up G21  | 0.00721         | 1.86145                   | 1.17200                | 2.18162                   |
| 167 | NM_001003955 ///<br>NM_177466                                | Rab11fip5   | RAB11 family interacting protein 5 (class I)                                   | up G21  | 0.04668         | 1.86004                   | -1.08294               | 1.71758                   |
| 168 | NM_030706                                                    | Trim2       | tripartite motif-containing 2                                                  | up G21  | 0.02128         | 1.85941                   | 1.37228                | 2.55164                   |
| 169 | NM_025833                                                    | Baiap2l1    | BAI1-associated protein 2-like 1                                               | up G21  | 0.00634         | 1.85034                   | -1.31859               | 1.40327                   |
| 170 | NM_020009                                                    | Mtor        | mechanistic target of rapamycin (serine/threonine kinase)                      | up G21  | 0.00918         | 1.85014                   | -1.18144               | 1.56601                   |
| 171 | NM_008140                                                    | Gnat1       | guanine nucleotide binding protein, alpha transducing 1                        | up G21  | 0.11870         | 1.84778                   | -1.00376               | 1.84086                   |
| 172 | NM_145516                                                    | Plekhb2     | pleckstrin homology domain containing, family B (evectins) member 2            | up G21  | 0.03427         | 1.84765                   | -1.74755               | 1.05728                   |
| 173 | NM_011163                                                    | Eif2ak2     | eukaryotic translation initiation factor 2-alpha kinase 2                      | up G21  | 0.00460         | 1.84711                   | 1.50816                | 2.78575                   |
| 174 | NM_001177713 ///<br>NM_175475                                | Cyp26b1     | cytochrome P450, family 26, subfamily b, polypeptide 1                         | up G21  | 0.16824         | 1.84596                   | 2.20623                | 4.07261                   |
| 175 | NM_011803                                                    | Klf6        | Kruppel-like factor 6                                                          | up G21  | 0.01916         | 1.84330                   | -1.28447               | 1.43506                   |



| No. | RefSeq Transcript ID                                                                         | Gene Symbol            | Gene Title                                                                       | Pattern | p-value (group) | Fold-Change* (G21/Virgin) | Fold-Change* (PP7/G21) | Fold-Change* (PP7/Virgin) |
|-----|----------------------------------------------------------------------------------------------|------------------------|----------------------------------------------------------------------------------|---------|-----------------|---------------------------|------------------------|---------------------------|
| 176 | NM_001025566 ///<br>NM_013490                                                                | Chka                   | choline kinase alpha                                                             | up G21  | 0.16147         | 1.84168                   | 1.33092                | 2.45113                   |
| 177 | NM_007623                                                                                    | Cbx2                   | chromobox homolog 2 (Drosophila Pc class)                                        | up G21  | 0.00056         | 1.84155                   | -1.27220               | 1.44753                   |
| 178 | NM_001081420                                                                                 | BC026590               | cDNA sequence BC026590                                                           | up G21  | 0.00722         | 1.83765                   | -1.39177               | 1.32037                   |
| 179 | NM_013541                                                                                    | Gstp1                  | glutathione S-transferase, pi 1                                                  | up G21  | 0.00064         | 1.83750                   | -1.04211               | 1.76325                   |
| 180 | NM_033314                                                                                    | Slco2a1                | solute carrier organic anion transporter family, member 2a1                      | up G21  | 0.01163         | 1.83496                   | 1.12202                | 2.05887                   |
| 181 | NM_020027                                                                                    | Bat2                   | HLA-B associated transcript 2                                                    | up G21  | 0.00085         | 1.83181                   | 1.38315                | 2.53367                   |
| 182 | NM_009931                                                                                    | Col4a1                 | collagen, type IV, alpha 1                                                       | up G21  | 0.00469         | 1.83035                   | -1.59097               | 1.15046                   |
| 183 | NM_029787                                                                                    | Cyb5r3                 | cytochrome b5 reductase 3                                                        | up G21  | 0.00721         | 1.82998                   | -1.08488               | 1.6868                    |
| 184 | NM_025735                                                                                    | Map1lc3a               | microtubule-associated protein 1 light chain 3 alpha                             | up G21  | 0.00025         | 1.82820                   | -1.01881               | 1.79446                   |
| 185 | NM_019699                                                                                    | Fads2                  | fatty acid desaturase 2                                                          | up G21  | 0.01319         | 1.82497                   | -1.50357               | 1.21376                   |
| 186 | NM_026878                                                                                    | Rasl11b                | RAS-like, family 11, member B                                                    | up G21  | 0.04136         | 1.81840                   | -1.31167               | 1.38632                   |
| 187 | NM_010011 ///<br>NM_201640 ///<br>XM_001475399                                               | Cyp4a10 ///<br>Cyp4a31 | cytochrome P450, family 4, subfamily a, polypeptide 10 /// cytochrome P450, fami | up G21  | 0.14430         | 1.81232                   | 1.02387                | 1.85559                   |
| 188 | NM_133962                                                                                    | Arhgef18               | rho/rac guanine nucleotide exchange factor (GEF) 18                              | up G21  | 0.00606         | 1.81037                   | -1.58656               | 1.14107                   |
| 189 | NM_001012402                                                                                 | Hs3st6                 | heparan sulfate (glucosamine) 3-O-sulfotransferase 6                             | up G21  | 0.04775         | 1.80567                   | -1.16961               | 1.54383                   |
| 190 | NM_144919                                                                                    | Hdac11                 | histone deacetylase 11                                                           | up G21  | 0.03468         | 1.80231                   | -1.03483               | 1.74165                   |
| 191 | NM_010799                                                                                    | Minpp1                 | multiple inositol polyphosphate histidine phosphatase 1                          | up G21  | 0.03305         | 1.80215                   | -1.32662               | 1.35845                   |
| 192 | NM_011318                                                                                    | Apcs                   | serum amyloid P-component                                                        | up G21  | 0.00151         | 1.80120                   | -1.12212               | 1.60518                   |
| 193 | NM_001164036 ///<br>NM_001164037 ///<br>NM_001164038 ///<br>NM_001164039 ///<br>NM_001164040 | Ly6e                   | lymphocyte antigen 6 complex, locus E                                            | up G21  | 0.00550         | 1.80045                   | -1.02582               | 1.75514                   |
| 194 | NM_029357                                                                                    | Pcdh1                  | protocadherin 1                                                                  | up G21  | 0.12880         | 1.79988                   | -1.10082               | 1.63503                   |
| 195 | NR_027828 ///<br>XM_001480596 ///<br>XM_919114                                               | Ncrna00081             | non-protein coding RNA 81                                                        | up G21  | 0.03901         | 1.79914                   | -1.08414               | 1.65951                   |
| 196 | NM_172580                                                                                    | Acot6                  | acyl-CoA thioesterase 6                                                          | up G21  | 0.03405         | 1.79868                   | 1.09022                | 1.96095                   |
| 197 | NM_011851                                                                                    | Nt5e                   | 5' nucleotidase, ecto                                                            | up G21  | 0.03963         | 1.79854                   | -1.13056               | 1.59083                   |
| 198 | NM_010956 ///<br>XM_001478677                                                                | Ogdh                   | oxoglutarate dehydrogenase (lipoamide)                                           | up G21  | 0.03867         | 1.79606                   | -1.00901               | 1.78003                   |
| 199 | NM_010442                                                                                    | Hmox1                  | heme oxygenase (decycling) 1                                                     | up G21  | 0.00644         | 1.79490                   | -1.01370               | 1.77064                   |

| No. | RefSeq Transcript ID                                 | Gene Symbol                                                                                                                                                                                                                                                   | Gene Title                                                                         | Pattern | p-value (group) | Fold-Change* (G21/Virgin) | Fold-Change* (PP7/G21) | Fold-Change* (PP7/Virgin) |
|-----|------------------------------------------------------|---------------------------------------------------------------------------------------------------------------------------------------------------------------------------------------------------------------------------------------------------------------|------------------------------------------------------------------------------------|---------|-----------------|---------------------------|------------------------|---------------------------|
| 200 | NM_001130458 ///<br>NM_001130459 ///<br>NM_015749    | Tcn2                                                                                                                                                                                                                                                          | transcobalamin 2                                                                   | up G21  | 0.01533         | 1.79278                   | -1.17862               | 1.52108                   |
| 201 | NM_016722                                            | Galns                                                                                                                                                                                                                                                         | galactosamine (N-acetyl)-6-sulfate sulfatase                                       | up G21  | 0.00362         | 1.78982                   | -1.03121               | 1.73565                   |
| 202 | XM_001476664 ///<br>XM_001476679 ///<br>XM_001476703 | 2010205A1<br>1Rik ///<br>Gm10883<br>/// Gm1420<br>/// Gm7202<br>/// Igk ///<br>Igk-C ///<br>Igk-J1 ///<br>Igk-V28 ///<br>LOC100047<br>628<br>Gm10883<br>/// Gm1420<br>/// Gm7202<br>/// Igk ///<br>Igk-C ///<br>Igk-J1 ///<br>Igk-V28 ///<br>LOC100047<br>628 | RIKEN cDNA 2010205A11 gene ///<br>predicted gene 10883 /// predicted gene 1420 /// | up G21  | 0.04751         | 1.78693                   | 1.22345                | 2.18622                   |
| 203 | XM_001476664 ///<br>XM_001476679 ///<br>XM_001476703 | /// Igk ///<br>Igk-C ///<br>Igk-J1 ///<br>Igk-V28 ///<br>LOC100047<br>628                                                                                                                                                                                     | predicted gene 10883 /// predicted gene 1420 /// predicted gene 7202 /// immunog   | up G21  | 0.04751         | 1.78693                   | 1.22345                | 2.18622                   |
| 204 | NM_010736                                            | Ltbr                                                                                                                                                                                                                                                          | lymphotoxin B receptor                                                             | up G21  | 0.00179         | 1.78613                   | -1.15847               | 1.5418                    |
| 205 | NM_001168469 ///<br>NM_145578                        | Ube2m                                                                                                                                                                                                                                                         | ubiquitin-conjugating enzyme E2M (UBC12 homolog, yeast)                            | up G21  | 0.02602         | 1.78492                   | -1.32202               | 1.35015                   |
| 206 | NM_011319                                            | Sars                                                                                                                                                                                                                                                          | seryl-aminoacyl-tRNA synthetase                                                    | up G21  | 0.00381         | 1.77995                   | -1.23642               | 1.43961                   |
| 207 | NM_138595                                            | Gldc                                                                                                                                                                                                                                                          | glycine decarboxylase                                                              | up G21  | 0.03021         | 1.77953                   | -1.04945               | 1.69568                   |
| 208 | NR_003368                                            | Pvt1                                                                                                                                                                                                                                                          | plasmacytoma variant translocation 1                                               | up G21  | 0.00686         | 1.77929                   | 1.64016                | 2.91832                   |
| 209 | NM_146073                                            | Zdhhc14                                                                                                                                                                                                                                                       | zinc finger, DHHC domain containing 14                                             | up G21  | 0.52474         | 1.77906                   | -1.41514               | 1.25715                   |
| 210 | NM_053090                                            | Fam126a                                                                                                                                                                                                                                                       | family with sequence similarity 126, member A                                      | up G21  | 0.01542         | 1.77783                   | 1.15601                | 2.05518                   |
| 211 | NM_007760                                            | Crat                                                                                                                                                                                                                                                          | carnitine acetyltransferase                                                        | up G21  | 0.02694         | 1.77302                   | -1.13534               | 1.56167                   |
| 212 | NM_133664                                            | Lad1                                                                                                                                                                                                                                                          | ladinin                                                                            | up G21  | 0.03909         | 1.77164                   | 1.25939                | 2.23119                   |
| 213 | NM_001145937 ///<br>NM_011857                        | Odz3                                                                                                                                                                                                                                                          | odd Oz/ten-m homolog 3 (Drosophila)                                                | up G21  | 0.04563         | 1.77069                   | -1.32869               | 1.33266                   |
| 214 | NM_001146217 ///<br>NM_022316                        | Smoc1                                                                                                                                                                                                                                                         | SPARC related modular calcium binding 1                                            | up G21  | 0.00033         | 1.77059                   | 1.05798                | 1.87325                   |
| 215 | NM_008621                                            | Mpp1                                                                                                                                                                                                                                                          | membrane protein, palmitoylated                                                    | up G21  | 0.00440         | 1.77047                   | -1.29439               | 1.3678                    |
| 216 | NM_021567                                            | Pcbp4                                                                                                                                                                                                                                                         | poly(rC) binding protein 4                                                         | up G21  | 0.03416         | 1.76655                   | 1.04967                | 1.85429                   |

| No. | RefSeq Transcript ID                              | Gene Symbol                           | Gene Title                                                                             | Pattern | p-value (group) | Fold-Change* (G21/Virgin) | Fold-Change* (PP7/G21) | Fold-Change* (PP7/Virgin) |
|-----|---------------------------------------------------|---------------------------------------|----------------------------------------------------------------------------------------|---------|-----------------|---------------------------|------------------------|---------------------------|
| 217 | NM_144847                                         | Nrbp2                                 | nuclear receptor binding protein 2                                                     | up G21  | 0.02331         | 1.76473                   | -1.53987               | 1.14602                   |
| 218 | NM_007493                                         | Asgr2                                 | asialoglycoprotein receptor 2                                                          | up G21  | 0.06124         | 1.76397                   | -1.44732               | 1.21879                   |
| 219 | NM_198411                                         | Inf2                                  | inverted formin, FH2 and WH2 domain containing                                         | up G21  | 0.07664         | 1.76186                   | -1.01084               | 1.74297                   |
| 220 | NM_008046                                         | Fst                                   | follistatin                                                                            | up G21  | 0.32576         | 1.76124                   | 1.04342                | 1.83771                   |
| 221 | NM_001161774 ///<br>NM_009176                     | St3gal3                               | ST3 beta-galactoside alpha-2,3-sialyltransferase 3                                     | up G21  | 0.01670         | 1.76119                   | -1.24314               | 1.41673                   |
| 222 | NM_175478                                         | Lrfn3                                 | leucine rich repeat and fibronectin type III domain containing 3                       | up G21  | 0.13265         | 1.75705                   | -1.20550               | 1.45753                   |
| 223 | NM_008467                                         | 9630025H1<br>6Rik ///<br>Kpna4        | RIKEN cDNA 9630025H16 gene ///<br>karyopherin (importin) alpha 4                       | up G21  | 0.00082         | 1.75265                   | -1.14851               | 1.52602                   |
| 224 | NM_030251                                         | Abtb1                                 | ankyrin repeat and BTB (POZ) domain containing 1                                       | up G21  | 0.00075         | 1.75143                   | -1.20666               | 1.45146                   |
| 225 | NM_008723 ///<br>NR_002702 ///<br>XM_916150       | LOC639633<br>/// Npm3 ///<br>Npm3-ps1 | similar to Nucleoplasmin-3 ///<br>nucleoplasmin 3 /// nucleoplasmin 3,<br>pseudogene 1 | up G21  | 0.05296         | 1.74749                   | 1.40415                | 2.45374                   |
| 226 | NM_001042592 ///<br>NM_025549                     | Arrdc4                                | arrestin domain containing 4                                                           | up G21  | 0.11673         | 1.74568                   | -1.09867               | 1.58891                   |
| 227 | NM_001002011 ///<br>NM_001111102 ///<br>NM_019390 | Lmna                                  | lamin A                                                                                | up G21  | 0.01111         | 1.74399                   | 1.61426                | 2.81525                   |
| 228 | NM_012032                                         | Serinc3                               | serine incorporator 3                                                                  | up G21  | 0.00057         | 1.74282                   | -1.30090               | 1.3397                    |
| 229 | NM_008538                                         | Marcks                                | myristoylated alanine rich protein kinase C substrate                                  | up G21  | 0.20359         | 1.73997                   | 1.12105                | 1.9506                    |
| 230 | NM_001136066 ///<br>NM_010443                     | Hmox2                                 | heme oxygenase (decycling) 2                                                           | up G21  | 0.00212         | 1.73766                   | -1.42802               | 1.21684                   |
| 231 | NM_019972                                         | Sort1                                 | sortilin 1                                                                             | up G21  | 0.00242         | 1.73702                   | -1.42848               | 1.21599                   |
| 232 | NM_172752                                         | Sorbs2                                | sorbin and SH3 domain containing 2                                                     | up G21  | 0.02682         | 1.73628                   | -1.16406               | 1.49157                   |
| 233 | NM_001130529 ///<br>NM_172941                     | Zkscan17                              | zinc finger with KRAB and SCAN domains 17                                              | up G21  | 0.03746         | 1.73403                   | -1.23263               | 1.40678                   |
| 234 | NM_001081205                                      | Nipal1                                | NIPA-like domain containing 1                                                          | up G21  | 0.08931         | 1.73087                   | -1.14343               | 1.51375                   |
| 235 | NM_153081                                         | Slc16a11                              | solute carrier family 16 (monocarboxylic acid transporters), member 11                 | up G21  | 0.00137         | 1.73007                   | -1.21200               | 1.42745                   |
| 236 | NM_001163689 ///<br>NM_025802 ///<br>NR_028142    | Pnpla2                                | patatin-like phospholipase domain containing 2                                         | up G21  | 0.00116         | 1.72841                   | -1.18364               | 1.46025                   |
| 237 | NM_153069                                         | Leap2                                 | liver-expressed antimicrobial peptide 2                                                | up G21  | 0.01929         | 1.72801                   | 1.02624                | 1.77336                   |
| 238 | NM_139149                                         | Fus                                   | fusion, derived from t(12;16) malignant liposarcoma (human)                            | up G21  | 0.04608         | 1.72383                   | -1.30770               | 1.31821                   |

| No. | RefSeq Transcript ID                                                                   | Gene Symbol            | Gene Title                                                                       | Pattern | p-value (group) | Fold-Change* (G21/Virgin) | Fold-Change* (PP7/G21) | Fold-Change* (PP7/Virgin) |
|-----|----------------------------------------------------------------------------------------|------------------------|----------------------------------------------------------------------------------|---------|-----------------|---------------------------|------------------------|---------------------------|
| 239 | NM_145575                                                                              | Cald1                  | caldesmon 1                                                                      | up G21  | 0.02877         | 1.72236                   | -1.21374               | 1.41905                   |
| 240 | NM_020586                                                                              | Herpud2                | HERPUD family member 2                                                           | up G21  | 0.00659         | 1.72177                   | -1.65922               | 1.03769                   |
| 241 | NM_026364 ///<br>XM_001481297 ///<br>XM_181343                                         | Prpsap1                | phosphoribosyl pyrophosphate synthetase-associated protein 1                     | up G21  | 0.02788         | 1.72118                   | -1.05471               | 1.6319                    |
| 242 | NM_001024945 ///<br>NM_023268                                                          | Qsox1                  | quiescin Q6 sulfhydryl oxidase 1                                                 | up G21  | 0.01305         | 1.72059                   | -1.01955               | 1.68759                   |
| 243 | NM_001161823 ///<br>NM_172382                                                          | Kdm4a                  | lysine (K)-specific demethylase 4A                                               | up G21  | 0.01198         | 1.71814                   | -1.03691               | 1.65699                   |
| 244 | NM_027985                                                                              | Mad2l2                 | MAD2 mitotic arrest deficient-like 2 (yeast)                                     | up G21  | 0.31659         | 1.71806                   | 1.04225                | 1.79065                   |
| 245 | NM_011327                                                                              | Scp2                   | Sterol carrier protein 2, liver                                                  | up G21  | 0.00644         | 1.71734                   | -1.07880               | 1.5919                    |
| 246 | NM_001033929 ///<br>NM_178413                                                          | Thnsl2                 | threonine synthase-like 2 (bacterial)                                            | up G21  | 0.00733         | 1.71444                   | 1.32227                | 2.26695                   |
| 247 | NM_198001                                                                              | 1110008P1<br>4Rik      | RIKEN cDNA 1110008P14 gene                                                       | up G21  | 0.01747         | 1.71180                   | -1.19458               | 1.43297                   |
| 248 | NM_001034962 ///<br>NM_001034963 ///<br>NM_001034964 ///<br>NM_009166 ///<br>NM_178362 | Sorbs1                 | sorbin and SH3 domain containing 1                                               | up G21  | 0.01938         | 1.71110                   | -1.23213               | 1.38873                   |
| 249 | NM_028043                                                                              | D1Bwg021<br>2e         | DNA segment, Chr 1, Brigham & Women's Genetics 0212 expressed                    | up G21  | 0.00214         | 1.70933                   | 1.18179                | 2.02008                   |
| 250 | NM_001081005                                                                           | 1500012F0<br>1Rik      | RIKEN cDNA 1500012F01 gene                                                       | up G21  | 0.05729         | 1.70917                   | -1.34886               | 1.26712                   |
| 251 | NM_001102404 ///<br>NM_001102405 ///<br>NM_007388                                      | Acp5                   | acid phosphatase 5, tartrate resistant                                           | up G21  | 0.00804         | 1.70542                   | -1.37796               | 1.23764                   |
| 252 | NM_025613                                                                              | Eid1                   | EP300 interacting inhibitor of differentiation 1                                 | up G21  | 0.09077         | 1.70525                   | -1.31283               | 1.29891                   |
| 253 | XM_001001707 ///<br>XM_001479244<br>NM_001025427 ///<br>NM_001039356 ///               | D630033O1<br>1Rik      | RIKEN cDNA D630033O11 gene                                                       | up G21  | 0.06467         | 1.70480                   | -1.12532               | 1.51495                   |
| 254 | NM_001166476 ///<br>NM_001166477 ///<br>NM_001166535                                   | Hmga1 ///<br>Hmga1-rs1 | high mobility group AT-hook 1 /// high mobility group AT-hook I, related sequenc | up G21  | 0.00113         | 1.70296                   | -1.15062               | 1.48004                   |
| 255 | NM_015786<br>NM_001146049 ///<br>NM_001146050 ///                                      | Hist1h1c               | histone cluster 1, H1c                                                           | up G21  | 0.11810         | 1.70235                   | -1.18448               | 1.43722                   |
| 256 | NM_001146052 ///<br>NM_001146053 ///<br>NM_016865                                      | Htatip2                | HIV-1 tat interactive protein 2, homolog (human)                                 | up G21  | 0.00165         | 1.70162                   | 1.38305                | 2.35343                   |

| No. | RefSeq Transcript ID                                                                         | Gene Symbol       | Gene Title                                                   | Pattern | p-value (group) | Fold-Change* (G21/Virgin) | Fold-Change* (PP7/G21) | Fold-Change* (PP7/Virgin) |
|-----|----------------------------------------------------------------------------------------------|-------------------|--------------------------------------------------------------|---------|-----------------|---------------------------|------------------------|---------------------------|
| 257 | NM_008562 ///<br>XR_031152                                                                   | Mcl1              | myeloid cell leukemia sequence 1                             | up G21  | 0.00180         | 1.69806                   | -1.11378               | 1.5246                    |
| 258 | NM_144839                                                                                    | Ube2e2            | ubiquitin-conjugating enzyme E2E 2 (UBC4/5 homolog, yeast)   | up G21  | 0.01759         | 1.69710                   | -1.26228               | 1.34447                   |
| 259 | NM_017462                                                                                    | Polg              | polymerase (DNA directed), gamma                             | up G21  | 0.01116         | 1.69706                   | -1.09194               | 1.55417                   |
| 260 | NM_007468                                                                                    | Apoa4             | apolipoprotein A-IV                                          | up G21  | 0.05130         | 1.69511                   | -1.17769               | 1.43935                   |
| 261 | NM_153112                                                                                    | Cadm4             | cell adhesion molecule 4                                     | up G21  | 0.15114         | 1.69408                   | -1.35340               | 1.25172                   |
| 262 | NM_007837                                                                                    | Ddit3             | DNA-damage inducible transcript 3                            | up G21  | 0.05214         | 1.69067                   | -1.18012               | 1.43263                   |
| 263 | NM_001146120 ///<br>NM_001146121 ///<br>NM_001146122 ///<br>NM_001146123 ///<br>NM_001146124 | Psap              | prosaposin                                                   | up G21  | 0.02413         | 1.69054                   | -1.01799               | 1.66067                   |
| 264 | NM_001081400 ///<br>XM_001480138 ///<br>XM_907664                                            | 1810013L2<br>4Rik | RIKEN cDNA 1810013L24 gene                                   | up G21  | 0.00253         | 1.69045                   | -1.18632               | 1.42495                   |
| 265 | NM_008194 ///<br>NM_212444                                                                   | Gyk               | glycerol kinase                                              | up G21  | 0.06429         | 1.68598                   | -1.75029               | -1.03815                  |
| 266 | NM_001164197 ///<br>NM_021412                                                                | Mmp19             | matrix metalloproteinase 19                                  | up G21  | 0.00025         | 1.67841                   | 1.34888                | 2.26397                   |
| 267 | NM_133900                                                                                    | Psph              | phosphoserine phosphatase                                    | up G21  | 0.08524         | 1.67824                   | -1.20710               | 1.39031                   |
| 268 | NM_011149                                                                                    | Ppib              | peptidylprolyl isomerase B                                   | up G21  | 0.02960         | 1.67740                   | -1.35448               | 1.23841                   |
| 269 | NM_138950 ///<br>XM_001002633 ///<br>XM_911699                                               | Wdr81             | WD repeat domain 81                                          | up G21  | 0.06250         | 1.67717                   | -1.10359               | 1.51974                   |
| 270 | NM_030703                                                                                    | Cpn1              | carboxypeptidase N, polypeptide 1                            | up G21  | 0.00163         | 1.67426                   | -1.18531               | 1.41251                   |
| 271 | NM_001040398                                                                                 | Setd1b            | SET domain containing 1B                                     | up G21  | 0.00492         | 1.67404                   | 1.09971                | 1.84095                   |
| 272 | NM_001127355 ///<br>NM_001127356 ///<br>NM_010122                                            | Eif2b4            | eukaryotic translation initiation factor 2B, subunit 4 delta | up G21  | 0.20049         | 1.67346                   | -1.04102               | 1.60752                   |
| 273 | NM_173744                                                                                    | 2610019F0<br>3Rik | RIKEN cDNA 2610019F03 gene                                   | up G21  | 0.19742         | 1.67185                   | -1.44725               | 1.15519                   |
| 274 | NM_026791                                                                                    | Fbxw9             | F-box and WD-40 domain protein 9                             | up G21  | 0.01343         | 1.67144                   | -1.42450               | 1.17335                   |
| 275 | NM_008878                                                                                    | Serpinf2          | serine (or cysteine) peptidase inhibitor, clade F, member 2  | up G21  | 0.00939         | 1.66751                   | -1.24715               | 1.33705                   |
| 276 | NM_010664                                                                                    | Krt18             | keratin 18                                                   | up G21  | 0.00801         | 1.66749                   | -1.07779               | 1.54714                   |
| 277 | NM_194342                                                                                    | Sun2              | Sad1 and UNC84 domain containing 2                           | up G21  | 0.05305         | 1.66498                   | -1.54914               | 1.07477                   |
| 278 | NM_001081292                                                                                 | Map3k10           | mitogen-activated protein kinase kinase kinase 10            | up G21  | 0.00513         | 1.66253                   | 1.09921                | 1.82747                   |

| No. | RefSeq Transcript ID                                                                         | Gene Symbol       | Gene Title                                                               | Pattern | p-value (group) | Fold-Change* (G21/Virgin) | Fold-Change* (PP7/G21) | Fold-Change* (PP7/Virgin) |
|-----|----------------------------------------------------------------------------------------------|-------------------|--------------------------------------------------------------------------|---------|-----------------|---------------------------|------------------------|---------------------------|
| 279 | NM_001163540 ///<br>NM_001163542 ///<br>NM_001163549 ///<br>NM_001164203 ///<br>NM_011117 // | Plec              | plectin                                                                  | up G21  | 0.04961         | 1.66206                   | 1.12953                | 1.87735                   |
| 280 | NM_134129                                                                                    | Prpf19            | PRP19/PSO4 pre-mRNA processing factor 19 homolog (S. cerevisiae)         | up G21  | 0.00347         | 1.65984                   | 1.09799                | 1.82248                   |
| 281 | NM_026211                                                                                    | Tmed9             | transmembrane emp24 protein transport domain containing 9                | up G21  | 0.01836         | 1.65934                   | 1.25633                | 2.08468                   |
| 282 | NM_001008550                                                                                 | Zfyve26           | zinc finger, FYVE domain containing 26                                   | up G21  | 0.01606         | 1.65841                   | 1.17704                | 1.95201                   |
| 283 | NM_001048227 ///<br>NM_001048228 ///<br>NM_001048229 ///<br>NM_026797                        | Dbndd2            | dysbindin (dystrobrevin binding protein 1) domain containing 2           | up G21  | 0.01994         | 1.65703                   | -1.00345               | 1.65133                   |
| 284 | NM_010757                                                                                    | Mafk              | v-maf musculoaponeurotic fibrosarcoma oncogene family, protein K (avian) | up G21  | 0.01587         | 1.65573                   | -1.04899               | 1.57841                   |
| 285 | NM_028440 ///<br>XM_001473245 ///<br>XM_912949                                               | 3110003A1<br>7Rik | RIKEN cDNA 3110003A17 gene                                               | up G21  | 0.02358         | 1.65352                   | 1.14952                | 1.90074                   |
| 286 | NM_029537                                                                                    | Tmem98            | transmembrane protein 98                                                 | up G21  | 0.00371         | 1.65343                   | 1.63159                | 2.69773                   |
| 287 | NM_030238                                                                                    | Dync1h1           | dynein cytoplasmic 1 heavy chain 1                                       | up G21  | 0.01697         | 1.65295                   | -1.00369               | 1.64687                   |
| 288 | NM_001136260 ///<br>NM_018760                                                                | Slc4a4            | solute carrier family 4 (anion exchanger), member 4                      | up G21  | 0.40719         | 1.65106                   | -1.11137               | 1.48561                   |
| 289 | NM_175406                                                                                    | Atp6v0d2          | ATPase, H+ transporting, lysosomal V0 subunit D2                         | up G21  | 0.10063         | 1.65002                   | -1.06369               | 1.55123                   |
| 290 | NM_001048008 ///<br>NM_023328                                                                | Agtbbp1           | ATP/GTP binding protein 1                                                | up G21  | 0.14858         | 1.64892                   | -1.16603               | 1.41414                   |
| 291 | NM_007383                                                                                    | Acads             | acyl-Coenzyme A dehydrogenase, short chain                               | up G21  | 0.00438         | 1.64734                   | -1.00362               | 1.64141                   |
| 292 | NM_001085515 ///<br>XM_001476939 ///<br>XM_283952                                            | Al464131          | expressed sequence Al464131                                              | up G21  | 0.05029         | 1.64369                   | -1.05459               | 1.5586                    |
| 293 | NM_153103                                                                                    | Kif1c             | kinesin family member 1C                                                 | up G21  | 0.00359         | 1.64366                   | -1.00198               | 1.64042                   |
| 294 | NM_001004468 ///<br>NM_021314 ///<br>NM_206856                                               | Tacc2             | transforming, acidic coiled-coil containing protein 2                    | up G21  | 0.05527         | 1.64265                   | -1.10762               | 1.48305                   |
| 295 | NM_022993                                                                                    | Lrp10             | low-density lipoprotein receptor-related protein 10                      | up G21  | 0.01636         | 1.64207                   | -1.08093               | 1.51912                   |
| 296 | NM_023580                                                                                    | Epha1             | Eph receptor A1                                                          | up G21  | 0.00849         | 1.64002                   | -1.17659               | 1.39388                   |
| 297 | NM_010515                                                                                    | Igf2r             | insulin-like growth factor 2 receptor                                    | up G21  | 0.09792         | 1.63886                   | -1.17349               | 1.39657                   |

| No. | RefSeq Transcript ID                                 | Gene Symbol    | Gene Title                                                    | Pattern | p-value (group) | Fold-Change* (G21/Virgin) | Fold-Change* (PP7/G21) | Fold-Change* (PP7/Virgin) |
|-----|------------------------------------------------------|----------------|---------------------------------------------------------------|---------|-----------------|---------------------------|------------------------|---------------------------|
| 298 | NM_008796                                            | Pctp           | phosphatidylcholine transfer protein                          | up G21  | 0.29772         | 1.63880                   | 1.83933                | 3.01429                   |
| 299 | NM_181540                                            | Tm6sf2         | transmembrane 6 superfamily member 2                          | up G21  | 0.04343         | 1.63849                   | 1.22346                | 2.00464                   |
| 300 | NM_009738                                            | Bche           | butyrylcholinesterase                                         | up G21  | 0.00057         | 1.63843                   | -1.19527               | 1.37076                   |
| 301 | NM_194348                                            | Atg2a          | ATG2 autophagy related 2 homolog A (S. cerevisiae)            | up G21  | 0.10253         | 1.63833                   | -1.27398               | 1.286                     |
| 302 | NM_011014                                            | Sigmar1        | sigma non-opioid intracellular receptor 1                     | up G21  | 0.13549         | 1.63721                   | 1.02869                | 1.68419                   |
| 303 | NM_001177812 ///<br>NM_001177813 ///<br>NM_146099    | D19Wsu16<br>2e | DNA segment, Chr 19, Wayne State University 162, expressed    | up G21  | 0.01122         | 1.63686                   | -1.09597               | 1.49352                   |
| 304 | NM_133858                                            | Fam63a         | family with sequence similarity 63, member A                  | up G21  | 0.01895         | 1.63285                   | -1.21173               | 1.34754                   |
| 305 | NM_001135577 ///<br>XM_001472442 ///<br>XM_001473940 | BC024659       | cDNA sequence BC024659                                        | up G21  | 0.02086         | 1.63110                   | -1.06587               | 1.5303                    |
| 306 | NM_011026                                            | P2rx4          | purinergic receptor P2X, ligand-gated ion channel 4           | up G21  | 0.01664         | 1.63065                   | -1.15419               | 1.41282                   |
| 307 | NM_010478                                            | Hspa1b         | heat shock protein 1B                                         | up G21  | 0.17994         | 1.62772                   | 1.33975                | 2.18074                   |
| 308 | NM_001081274                                         | Pgd            | phosphogluconate dehydrogenase                                | up G21  | 0.05831         | 1.62624                   | 1.62651                | 2.6451                    |
| 309 | NM_001039194 ///<br>NM_153779 ///<br>NM_178058       | Aifm2          | apoptosis-inducing factor, mitochondrion-associated 2         | up G21  | 0.07841         | 1.62546                   | -1.36954               | 1.18686                   |
| 310 | NM_029364                                            | Gns            | glucosamine (N-acetyl)-6-sulfatase                            | up G21  | 0.00667         | 1.62146                   | -1.22298               | 1.32583                   |
| 311 | NM_007962                                            | Mpzl2          | myelin protein zero-like 2                                    | up G21  | 0.00171         | 1.62017                   | -1.31377               | 1.23323                   |
| 312 | NM_008492                                            | Ldhb           | lactate dehydrogenase B                                       | up G21  | 0.01591         | 1.61999                   | -1.17845               | 1.37468                   |
| 313 | NM_013581                                            | Cog1           | component of oligomeric golgi complex 1                       | up G21  | 0.01976         | 1.61990                   | -1.33837               | 1.21036                   |
| 314 | NM_001102455 ///<br>NM_001102456 ///<br>NM_009691    | Aplp2          | amyloid beta (A4) precursor-like protein 2                    | up G21  | 0.03650         | 1.61911                   | -1.24807               | 1.29729                   |
| 315 | NM_001136064 ///<br>NM_008144                        | Bscl2          | Bernardinelli-Seip congenital lipodystrophy 2 homolog (human) | up G21  | 0.00090         | 1.60948                   | -1.14298               | 1.40814                   |
| 316 | NM_010893                                            | Neu1           | neuraminidase 1                                               | up G21  | 0.00178         | 1.60926                   | -1.34794               | 1.19387                   |
| 317 | NM_007527                                            | Bax            | BCL2-associated X protein                                     | up G21  | 0.04783         | 1.60815                   | 1.32533                | 2.13133                   |
| 318 | NM_001048061 ///<br>NM_010448                        | Hnrnpab        | heterogeneous nuclear ribonucleoprotein A/B                   | up G21  | 0.01959         | 1.60652                   | -1.12406               | 1.42921                   |
| 319 | NM_020507                                            | Tob2           | transducer of ERBB2, 2                                        | up G21  | 0.28201         | 1.60589                   | -1.42600               | 1.12615                   |
| 320 | NM_011609                                            | Tnfrsf1a       | tumor necrosis factor receptor superfamily, member 1a         | up G21  | 0.02475         | 1.60141                   | -1.19795               | 1.3368                    |
| 321 | NM_001039581 ///<br>NM_013855                        | Abca3          | ATP-binding cassette, sub-family A (ABC1), member 3           | up G21  | 0.01916         | 1.60113                   | -1.03003               | 1.55444                   |

| No. | RefSeq Transcript ID                              | Gene Symbol | Gene Title                                                       | Pattern | p-value (group) | Fold-Change* (G21/Virgin) | Fold-Change* (PP7/G21) | Fold-Change* (PP7/Virgin) |
|-----|---------------------------------------------------|-------------|------------------------------------------------------------------|---------|-----------------|---------------------------|------------------------|---------------------------|
| 322 | NM_023530                                         | Pla2g12b    | phospholipase A2, group XIIB                                     | up G21  | 0.00231         | 1.59962                   | -1.26074               | 1.26879                   |
| 323 | NM_001083904 ///<br>NM_001083905 ///<br>NM_021564 | Fetub       | fetuin beta                                                      | up G21  | 0.01471         | 1.59917                   | -1.35035               | 1.18427                   |
| 324 | NM_001039520                                      | Dnm2        | dynamamin 2                                                      | up G21  | 0.04160         | 1.59842                   | -1.02711               | 1.55623                   |
| 325 | NM_009450                                         | Tubb2a      | tubulin, beta 2A                                                 | up G21  | 0.01817         | 1.59827                   | 2.45196                | 3.91888                   |
| 326 | NM_009443 ///<br>XM_001471628                     | Tgoln1      | trans-golgi network protein                                      | up G21  | 0.40378         | 1.59474                   | -1.31240               | 1.21514                   |
| 327 | NM_021456                                         | Ces1        | carboxylesterase 1                                               | up G21  | 0.06000         | 1.59473                   | -1.13836               | 1.40089                   |
| 328 | NM_016905                                         | Galk1       | galactokinase 1                                                  | up G21  | 0.02574         | 1.59158                   | -1.36574               | 1.16536                   |
| 329 | NM_008256                                         | Hmgcs2      | 3-hydroxy-3-methylglutaryl-Coenzyme A synthase 2                 | up G21  | 0.04512         | 1.59070                   | -1.39848               | 1.13745                   |
| 330 | NM_181072                                         | Myo1e       | myosin IE                                                        | up G21  | 0.12397         | 1.58989                   | -1.19953               | 1.32542                   |
| 331 | NM_001077411 ///<br>NM_008094                     | Gba         | glucosidase, beta, acid                                          | up G21  | 0.00032         | 1.58185                   | -1.54552               | 1.02351                   |
| 332 | NM_001142681 ///<br>NM_026522                     | Chid1       | chitinase domain containing 1                                    | up G21  | 0.01069         | 1.57735                   | -1.19360               | 1.32151                   |
| 333 | NM_194334                                         | Tbc1d2b     | TBC1 domain family, member 2B                                    | up G21  | 0.01811         | 1.57601                   | -1.18775               | 1.32689                   |
| 334 | NM_138677                                         | Edem1       | ER degradation enhancer, mannosidase alpha-like 1                | up G21  | 0.00955         | 1.57367                   | -1.14289               | 1.37691                   |
| 335 | NM_031165                                         | Hspa8       | heat shock protein 8                                             | up G21  | 0.26086         | 1.57290                   | 1.03329                | 1.62527                   |
| 336 | NM_146251                                         | Pnpla7      | patatin-like phospholipase domain containing 7                   | up G21  | 0.02130         | 1.57162                   | 1.02001                | 1.60307                   |
| 337 | NM_173011                                         | ldh2        | isocitrate dehydrogenase 2 (NADP+), mitochondrial                | up G21  | 0.01519         | 1.57099                   | -1.11197               | 1.41279                   |
| 338 | NM_013772                                         | Tcl1b3      | T-cell leukemia/lymphoma 1B, 3                                   | up G21  | 0.01682         | 1.57077                   | -1.19450               | 1.31499                   |
| 339 | NM_001001144 ///<br>NM_001103162                  | Scap        | SREBF chaperone                                                  | up G21  | 0.03723         | 1.56906                   | 1.18167                | 1.85411                   |
| 340 | NM_145987                                         | Tmem82      | transmembrane protein 82                                         | up G21  | 0.01279         | 1.56570                   | -1.11150               | 1.40864                   |
| 341 | NM_008175                                         | Gm          | granulin                                                         | up G21  | 0.05892         | 1.56532                   | -1.31054               | 1.19441                   |
| 342 | NM_010688                                         | Lasp1       | LIM and SH3 protein 1                                            | up G21  | 0.01447         | 1.56180                   | -1.03136               | 1.51431                   |
| 343 | NM_144880 ///<br>XM_001476699                     | Ppp2r5a     | protein phosphatase 2, regulatory subunit B (B56), alpha isoform | up G21  | 0.05618         | 1.55467                   | -1.14327               | 1.35984                   |
| 344 | NM_018816                                         | Apom        | apolipoprotein M                                                 | up G21  | 0.00428         | 1.54765                   | -1.20182               | 1.28776                   |
| 345 | NM_145424                                         | BC089597    | cDNA sequence BC089597                                           | up G21  | 0.00156         | 1.53677                   | -1.13677               | 1.35188                   |
| 346 | NM_007471                                         | App         | amyloid beta (A4) precursor protein                              | up G21  | 0.05091         | 1.52264                   | -1.51936               | 1.00216                   |
| 347 | NM_145146                                         | Afm         | afamin                                                           | up G21  | 0.00228         | 1.50776                   | -1.28152               | 1.17654                   |



| No. | RefSeq Transcript ID                              | Gene Symbol                         | Gene Title                                                                       | Pattern  | p-value (group) | Fold-Change* (G21/Virgin) | Fold-Change* (PP7/G21) | Fold-Change* (PP7/Virgin) |
|-----|---------------------------------------------------|-------------------------------------|----------------------------------------------------------------------------------|----------|-----------------|---------------------------|------------------------|---------------------------|
| 348 | NM_009693                                         | Apob                                | apolipoprotein B                                                                 | up G21   | 0.00082         | 1.49565                   | -1.03038               | 1.45156                   |
| 349 | NM_007428                                         | Agt                                 | angiotensinogen (serpin peptidase inhibitor, clade A, member 8)                  | up G21   | 0.02483         | 1.48221                   | -1.12761               | 1.31447                   |
| 350 | NM_011254 ///<br>XM_001473622                     | Rbp1                                | retinol binding protein 1, cellular                                              | up G21   | 0.03134         | 1.48155                   | -1.23642               | 1.19826                   |
| 351 | NM_008254                                         | Hmgcl                               | 3-hydroxy-3-methylglutaryl-Coenzyme A lyase                                      | up G21   | 0.00255         | 1.47797                   | -1.33762               | 1.10493                   |
| 352 | NM_001110252 ///<br>NM_008281                     | Hpn                                 | hepsin                                                                           | up G21   | 0.03250         | 1.47282                   | -1.06922               | 1.37747                   |
| 353 | NM_008342                                         | Igfbp2                              | insulin-like growth factor binding protein 2                                     | up G21   | 0.07757         | 1.46066                   | -1.06637               | 1.36975                   |
| 354 | NM_001109991 ///<br>NM_009929                     | Col18a1                             | collagen, type XVIII, alpha 1                                                    | up G21   | 0.01373         | 1.44220                   | -1.22406               | 1.1782                    |
| 355 | NM_008490                                         | Lcat                                | lecithin cholesterol acyltransferase                                             | up G21   | 0.01498         | 1.43032                   | -1.36014               | 1.05159                   |
| 356 | NM_016764                                         | Prdx4                               | peroxiredoxin 4                                                                  | up G21   | 0.00900         | 1.40454                   | -1.39621               | 1.00597                   |
| 357 | NM_008406                                         | Itih1                               | inter-alpha trypsin inhibitor, heavy chain 1                                     | up G21   | 0.00487         | 1.39020                   | -1.24881               | 1.11322                   |
| 358 | NM_146094                                         | Fads1                               | fatty acid desaturase 1                                                          | up G21   | 0.02085         | 1.36623                   | -1.11768               | 1.22238                   |
| 359 | NM_016668                                         | Bhmt                                | betaine-homocysteine methyltransferase                                           | up G21   | 0.00682         | 1.34528                   | -1.01703               | 1.32276                   |
| 360 | NM_001102411 ///<br>NM_001102412 ///<br>NM_023125 | Kng1                                | kininogen 1                                                                      | up G21   | 0.00187         | 1.33829                   | -1.20637               | 1.10935                   |
| 361 | NM_172476                                         | Tmc7                                | transmembrane channel-like gene family 7                                         | down PP7 | 0.00356         | 1.72541                   | -2.21442               | -1.28342                  |
| 362 | NM_001042671 ///<br>NM_001042672 ///<br>NM_028802 | Gpcpd1                              | glycerophosphocholine phosphodiesterase GDE1 homolog (S. cerevisiae)             | down PP7 | 0.18571         | 1.71036                   | -2.32423               | -1.35892                  |
| 363 | NM_001171004 ///<br>NM_001171005 ///<br>NM_029239 | Prkd3                               | protein kinase D3                                                                | down PP7 | 0.17700         | 1.63202                   | -2.00531               | -1.22873                  |
| 364 | NM_009700                                         | Aqp4                                | aquaporin 4                                                                      | down PP7 | 0.03030         | 1.60723                   | -2.52791               | -1.57284                  |
| 365 | NM_178617                                         | Necab1                              | N-terminal EF-hand calcium binding protein 1                                     | down PP7 | 0.27107         | 1.58888                   | -2.08408               | -1.31167                  |
| 366 | NM_153078                                         | Ehbp1                               | EH domain binding protein 1                                                      | down PP7 | 0.01316         | 1.58673                   | -1.83817               | -1.15846                  |
| 367 | NM_001009935 ///<br>NM_023719                     | Txnip                               | thioredoxin interacting protein                                                  | down PP7 | 0.02025         | 1.53791                   | -2.38637               | -1.5517                   |
| 368 | NM_001159367 ///<br>NM_011065                     | Per1                                | period homolog 1 (Drosophila)                                                    | down PP7 | 0.13721         | 1.52416                   | -1.71536               | -1.12545                  |
| 369 | NM_012006 ///<br>NM_134188 ///<br>XR_031056       | Acot1 ///<br>Acot2 ///<br>LOC100044 | acyl-CoA thioesterase 1 /// acyl-CoA thioesterase 2 /// similar to acyl-CoA thio | down PP7 | 0.54251         | 1.52226                   | -1.72954               | -1.13616                  |

| No. | RefSeq Transcript ID          | Gene Symbol | Gene Title                                                                      | Pattern  | p-value (group) | Fold-Change* (G21/Virgin) | Fold-Change* (PP7/G21) | Fold-Change* (PP7/Virgin) |
|-----|-------------------------------|-------------|---------------------------------------------------------------------------------|----------|-----------------|---------------------------|------------------------|---------------------------|
| 370 | NM_013562                     | Ifrd1       | interferon-related developmental regulator 1                                    | down PP7 | 0.15086         | 1.51278                   | -1.68601               | -1.11452                  |
| 371 | NM_080289                     | Grhpr       | glyoxylate reductase/hydroxypyruvate reductase                                  | down PP7 | 0.09776         | 1.50673                   | -1.58673               | -1.0531                   |
| 372 | NM_027455                     | Qpct        | glutaminyl-peptide cyclotransferase (glutaminyl cyclase)                        | down PP7 | 0.05964         | 1.48176                   | -2.38308               | -1.60827                  |
| 373 | NM_029796                     | Lrg1        | leucine-rich alpha-2-glycoprotein 1                                             | down PP7 | 0.10021         | 1.43682                   | -1.78615               | -1.24313                  |
| 374 | NM_010220                     | Fkbp5       | FK506 binding protein 5                                                         | down PP7 | 0.00110         | 1.40973                   | -2.25242               | -1.59777                  |
| 375 | NM_020581                     | Angptl4     | angiopoietin-like 4                                                             | down PP7 | 0.01265         | 1.39349                   | -3.35199               | -2.40546                  |
| 376 | NM_133748 ///<br>NM_178082    | Insig2      | insulin induced gene 2                                                          | down PP7 | 0.33685         | 1.38282                   | -1.58377               | -1.14532                  |
| 377 | NM_001083958 ///<br>NM_028298 | Zfp655      | zinc finger protein 655                                                         | down PP7 | 0.06234         | 1.35393                   | -1.94384               | -1.4357                   |
| 378 | NM_001042591                  | Arrdc3      | arrestin domain containing 3                                                    | down PP7 | 0.01794         | 1.34245                   | -2.51066               | -1.87021                  |
| 379 | NM_008176                     | Cxcl1       | chemokine (C-X-C motif) ligand 1                                                | down PP7 | 0.42572         | 1.33282                   | -1.80377               | -1.35335                  |
| 380 | NM_009117                     | Saa1        | serum amyloid A 1                                                               | down PP7 | 0.30682         | 1.33245                   | -2.08859               | -1.56749                  |
| 381 | NM_007981                     | Acsl1       | acyl-CoA synthetase long-chain family member 1                                  | down PP7 | 0.05402         | 1.31930                   | -1.98101               | -1.50157                  |
| 382 | NM_011521                     | Sdc4        | syndecan 4                                                                      | down PP7 | 0.00270         | 1.31410                   | -1.43031               | -1.08843                  |
| 383 | NM_019410                     | Pfn2        | profilin 2                                                                      | down PP7 | 0.00701         | 1.27710                   | -1.97534               | -1.54673                  |
| 384 | NM_146011                     | Arhgap9     | Rho GTPase activating protein 9                                                 | down PP7 | 0.02365         | 1.25386                   | -1.80317               | -1.43809                  |
| 385 | NM_133898                     | N4bp2l1     | NEDD4 binding protein 2-like 1                                                  | down PP7 | 0.05488         | 1.25295                   | -2.27207               | -1.81337                  |
| 386 | NM_029562                     | Cyp2d26     | cytochrome P450, family 2, subfamily d, polypeptide 26                          | down PP7 | 0.00418         | 1.24773                   | -1.39952               | -1.12165                  |
| 387 | NM_011200                     | Ptp4a1      | protein tyrosine phosphatase 4a1                                                | down PP7 | 0.00195         | 1.23015                   | -1.58524               | -1.28865                  |
| 388 | NM_030732                     | Tbl1xr1     | transducin (beta)-like 1X-linked receptor 1                                     | down PP7 | 0.03726         | 1.22322                   | -1.85493               | -1.51643                  |
| 389 | NM_145365                     | Creb3l3     | cAMP responsive element binding protein 3-like 3                                | down PP7 | 0.03989         | 1.19125                   | -1.62734               | -1.36608                  |
| 390 | NM_177054 ///<br>NM_199038    | Casc4       | cancer susceptibility candidate 4                                               | down PP7 | 0.10835         | 1.17645                   | -2.06374               | -1.75421                  |
| 391 | NM_011825                     | Grem2       | gremlin 2 homolog, cysteine knot superfamily ( <i>Xenopus laevis</i> )          | down PP7 | 0.27867         | 1.16525                   | -1.65024               | -1.41622                  |
| 392 | NM_054055                     | Slc13a3     | solute carrier family 13 (sodium-dependent dicarboxylate transporter), member 3 | down PP7 | 0.12568         | 1.15232                   | -1.64744               | -1.42968                  |
| 393 | NM_010517                     | Igfbp4      | insulin-like growth factor binding protein 4                                    | down PP7 | 0.16362         | 1.15021                   | -1.23270               | -1.07171                  |
| 394 | NM_007980                     | Fabp2       | fatty acid binding protein 2, intestinal                                        | down PP7 | 0.06783         | 1.13925                   | -1.95251               | -1.71385                  |

| No. | RefSeq Transcript ID                           | Gene Symbol   | Gene Title                                                                       | Pattern  | p-value (group) | Fold-Change* (G21/Virgin) | Fold-Change* (PP7/G21) | Fold-Change* (PP7/Virgin) |
|-----|------------------------------------------------|---------------|----------------------------------------------------------------------------------|----------|-----------------|---------------------------|------------------------|---------------------------|
| 395 | NM_015767                                      | Ttpa          | tocopherol (alpha) transfer protein                                              | down PP7 | 0.04229         | 1.13351                   | -1.29058               | -1.13857                  |
| 396 | NM_026819                                      | Dhrs1         | dehydrogenase/reductase (SDR family) member 1                                    | down PP7 | 0.15318         | 1.13016                   | -1.63870               | -1.44997                  |
| 397 | NM_001033324                                   | Zbtb16        | zinc finger and BTB domain containing 16                                         | down PP7 | 0.06494         | 1.12881                   | -2.19763               | -1.94686                  |
| 398 | NM_007376                                      | Pzp           | pregnancy zone protein                                                           | down PP7 | 0.02746         | 1.12414                   | -1.14949               | -1.02255                  |
| 399 | NM_033037                                      | Cdo1          | cysteine dioxygenase 1, cytosolic                                                | down PP7 | 0.00738         | 1.12053                   | -1.28181               | -1.14393                  |
| 400 | NM_134114 ///<br>XM_001471593                  | Sft2d1        | SFT2 domain containing 1                                                         | down PP7 | 0.05451         | 1.10663                   | -1.63968               | -1.48169                  |
| 401 | NM_009243                                      | Serpina1a     | serine (or cysteine) peptidase inhibitor, clade A, member 1A                     | down PP7 | 0.08364         | 1.10211                   | -1.13588               | -1.03064                  |
| 402 | NM_010565                                      | Inhbc         | inhibin beta-C                                                                   | down PP7 | 0.03213         | 1.10004                   | -2.51739               | -2.28846                  |
| 403 | NM_029494                                      | Rab30         | RAB30, member RAS oncogene family                                                | down PP7 | 0.00992         | 1.09324                   | -2.07150               | -1.89483                  |
| 404 | NM_172715                                      | Agpat9        | 1-acylglycerol-3-phosphate O-acyltransferase 9                                   | down PP7 | 0.05455         | 1.09261                   | -1.76358               | -1.61409                  |
| 405 | NM_001012310                                   | AI132487      | expressed sequence AI132487                                                      | down PP7 | 0.03958         | 1.07919                   | -1.70079               | -1.57599                  |
| 406 | NM_022331                                      | Herpud1       | homocysteine-inducible, endoplasmic reticulum stress-inducible, ubiquitin-like d | down PP7 | 0.00783         | 1.05061                   | -1.96883               | -1.874                    |
| 407 | NM_008058                                      | Fzd8          | frizzled homolog 8 (Drosophila)                                                  | down PP7 | 0.27499         | 1.04177                   | -1.92541               | -1.84822                  |
| 408 | NM_008382                                      | Inhbe         | inhibin beta E                                                                   | down PP7 | 0.19421         | 1.03269                   | -2.41437               | -2.33795                  |
| 409 | NM_011044                                      | Pck1          | phosphoenolpyruvate carboxykinase 1, cytosolic                                   | down PP7 | 0.15013         | 1.02190                   | -1.65432               | -1.61887                  |
| 410 | NM_133753                                      | Errfi1        | ERBB receptor feedback inhibitor 1                                               | down PP7 | 0.06449         | 1.01166                   | -1.49806               | -1.4808                   |
| 411 | XM_001480564                                   | Gm4586        | predicted gene 4586                                                              | down PP7 | 0.13202         | 1.00142                   | -1.68608               | -1.68369                  |
| 412 | NM_146008                                      | Tcp11l2       | t-complex 11 (mouse) like 2                                                      | down PP7 | 0.30692         | -1.00233                  | -1.70868               | -1.71266                  |
| 413 | NM_026232                                      | Slc25a30      | solute carrier family 25, member 30                                              | down PP7 | 0.02607         | -1.01312                  | -2.78431               | -2.82083                  |
| 414 | NM_026821                                      | D4Bwg0951e    | DNA segment, Chr 4, Brigham & Women's Genetics 0951 expressed                    | down PP7 | 0.04153         | -1.02092                  | -1.92877               | -1.96911                  |
| 415 | NM_144784                                      | Acat1         | acetyl-Coenzyme A acetyltransferase 1                                            | down PP7 | 0.00464         | -1.02116                  | -2.02742               | -2.07033                  |
| 416 | NM_175523                                      | Ppm1k         | protein phosphatase 1K (PP2C domain containing)                                  | down PP7 | 0.26560         | -1.02383                  | -1.64150               | -1.68063                  |
| 417 | NM_001130412 ///<br>NM_015763 ///<br>NM_172950 | Lpin1         | lipin 1                                                                          | down PP7 | 0.08664         | -1.02461                  | -2.07209               | -2.12308                  |
| 418 | NM_029870                                      | A930001N09Rik | RIKEN cDNA A930001N09 gene                                                       | down PP7 | 0.11818         | -1.05003                  | -1.67265               | -1.75633                  |
| 419 | NM_013797                                      | Slco1a1       | solute carrier organic anion transporter family, member 1a1                      | down PP7 | 0.00861         | -1.09402                  | -1.59588               | -1.74591                  |

| No. | RefSeq Transcript ID                                                  | Gene Symbol       | Gene Title                                                   | Pattern  | p-value (group) | Fold-Change* (G21/Virgin) | Fold-Change* (PP7/G21) | Fold-Change* (PP7/Virgin) |
|-----|-----------------------------------------------------------------------|-------------------|--------------------------------------------------------------|----------|-----------------|---------------------------|------------------------|---------------------------|
| 420 | NM_145572                                                             | Gys2              | glycogen synthase 2                                          | down PP7 | 0.02585         | -1.10010                  | -1.69188               | -1.86124                  |
| 421 | NM_007811                                                             | Cyp26a1           | cytochrome P450, family 26, subfamily a, polypeptide 1       | down PP7 | 0.28371         | -1.10919                  | -1.63840               | -1.8173                   |
| 422 | NM_008358 ///<br>NM_133836                                            | Il15ra            | interleukin 15 receptor, alpha chain                         | down PP7 | 0.01636         | -1.11896                  | -1.72439               | -1.92953                  |
| 423 | NM_026929                                                             | Chac1             | ChaC, cation transport regulator-like 1 (E. coli)            | down PP7 | 0.11977         | -1.12374                  | -2.77952               | -3.12344                  |
| 424 | NM_138654                                                             | 5033411D1<br>2Rik | RIKEN cDNA 5033411D12 gene                                   | down PP7 | 0.00099         | -1.18452                  | -2.28268               | -2.70387                  |
| 425 | NM_022026 ///<br>XM_001003981 ///<br>XM_980183                        | Aqp9              | aquaporin 9                                                  | down PP7 | 0.03147         | -1.19058                  | -1.91949               | -2.28531                  |
| 426 | NM_026931                                                             | 1810011O1<br>0Rik | RIKEN cDNA 1810011O10 gene                                   | down PP7 | 0.21838         | -1.22871                  | -1.63621               | -2.01043                  |
| 427 | NM_001166409 ///<br>NM_001166410 ///<br>NM_001166411 ///<br>NM_016809 | Rbm3              | RNA binding motif protein 3                                  | down PP7 | 0.11298         | -1.24188                  | -1.60406               | -1.99205                  |
| 428 | NM_001039090 ///<br>NM_011386                                         | Skil              | SKI-like                                                     | down PP7 | 0.00137         | -1.36158                  | -1.73089               | -2.35675                  |
| 429 | NM_146148                                                             | C8a               | complement component 8, alpha polypeptide                    | down PP7 | 0.01174         | -1.41739                  | -1.90548               | -2.7008                   |
| 430 | NM_153198 ///<br>NM_177993                                            | Hbp1              | high mobility group box transcription factor 1               | down PP7 | 0.02364         | -1.43526                  | -1.79978               | -2.58316                  |
| 431 | NM_007606                                                             | Car3              | carbonic anhydrase 3                                         | down PP7 | 0.00987         | -1.51882                  | -1.49412               | -2.26929                  |
| 432 | NM_011316                                                             | Saa4              | serum amyloid A 4                                            | down PP7 | 0.00389         | -1.98992                  | -1.89984               | -3.78053                  |
| 433 | NM_007813                                                             | Cyp2b13           | cytochrome P450, family 2, subfamily b, polypeptide 13       | down PP7 | 0.02031         | -3.31558                  | -2.15548               | -7.14665                  |
| 434 | NM_020495 ///<br>NM_178235                                            | Slco1b2           | solute carrier organic anion transporter family, member 1b2  | down PP7 | 0.01657         | -4.05104                  | -1.97889               | -8.01658                  |
| 435 | NM_011458                                                             | Serpina3k         | serine (or cysteine) peptidase inhibitor, clade A, member 3K | down PP7 | 0.00450         | -4.14506                  | -1.74651               | -7.2394                   |

**Table S3.** Genes downregulated at term (compared to virgin) and upregulated at PP7 (compared to G21) (\* For negative fold change = down-regulated; positive fold change = up-regulated)

| No. | RefSeq Transcript ID                                            | Gene Symbol                  | Gene Title                                                                                                                                                   | p-value (group) | Fold-Change* (G21/Virgin) | Fold-Change* (PP7/G21) | Fold-Change* (PP7/Virgin) |
|-----|-----------------------------------------------------------------|------------------------------|--------------------------------------------------------------------------------------------------------------------------------------------------------------|-----------------|---------------------------|------------------------|---------------------------|
| 1   | NM_008567                                                       | Mcm6                         | minichromosome maintenance deficient 6 (MIS5 homolog, S. pombe) (S. cerevisiae)                                                                              | 0.0003          | -23.85                    | 5.49                   | -4.34                     |
| 2   | NM_010701                                                       | Lect1                        | leukocyte cell derived chemotaxin 1                                                                                                                          | 0.0008          | -18.07                    | 5.20                   | -3.48                     |
| 3   | NM_008234                                                       | Hells                        | helicase, lymphoid specific                                                                                                                                  | 0.0037          | -17.10                    | 3.64                   | -4.70                     |
| 4   | NM_007691                                                       | Chek1                        | checkpoint kinase 1 homolog (S. pombe)                                                                                                                       | 0.0043          | -13.71                    | 2.76                   | -4.96                     |
| 5   | NM_013485                                                       | C9                           | complement component 9                                                                                                                                       | 0.0094          | -13.71                    | 3.81                   | -3.60                     |
| 6   | NM_008565                                                       | Mcm4                         | minichromosome maintenance deficient 4 homolog (S. cerevisiae)                                                                                               | 0.0007          | -13.30                    | 4.91                   | -2.71                     |
| 7   | NM_008566                                                       | Mcm5                         | minichromosome maintenance deficient 5, cell division cycle 46 (S. cerevisiae)                                                                               | 0.0022          | -12.97                    | 3.76                   | -3.45                     |
| 8   | NM_001163359 ///<br>NM_001163360 ///<br>NM_021891               | Figl1                        | fidgetin-like 1                                                                                                                                              | 0.0025          | -10.98                    | 3.01                   | -3.64                     |
| 9   | NM_030210                                                       | Aacs                         | acetoacetyl-CoA synthetase                                                                                                                                   | 0.0146          | -7.43                     | 6.55                   | -1.13                     |
| 10  | NM_008564                                                       | Mcm2                         | minichromosome maintenance deficient 2 mitotin (S. cerevisiae)                                                                                               | 0.0072          | -7.41                     | 2.37                   | -3.12                     |
| 11  | NM_008295                                                       | Hsd3b5                       | hydroxy-delta-5-steroid dehydrogenase, 3 beta- and steroid delta-isomerase 5                                                                                 | 0.0977          | -6.30                     | 4.44                   | -1.42                     |
| 12  | NM_001081642 ///<br>NM_021365 /// NM_183094<br>/// XM_001471888 | Xlr4a /// Xlr4b<br>/// Xlr4c | x-linked lymphocyte-regulated protein 3A-like /// X-linked lymphocyte-regulated 4A /// X-linked lymphocyte-regulated 4B /// X-linked lymphocyte-regulated 4C | 0.1953          | -6.29                     | 2.26                   | -2.79                     |
| 13  | NM_008255                                                       | Hmgcr                        | 3-hydroxy-3-methylglutaryl-Coenzyme A reductase                                                                                                              | 0.1123          | -5.90                     | 4.14                   | -1.43                     |
| 14  | NM_008921                                                       | Prim1                        | DNA primase, p49 subunit                                                                                                                                     | 0.0019          | -5.65                     | 2.04                   | -2.77                     |
| 15  | NM_008280                                                       | Lipc                         | lipase, hepatic                                                                                                                                              | 0.0375          | -5.65                     | 4.51                   | -1.25                     |
| 16  | NM_026993                                                       | Ddah1                        | dimethylarginine dimethylaminohydrolase 1                                                                                                                    | 0.0064          | -5.41                     | 3.89                   | -1.39                     |

| No. | RefSeq Transcript ID                        | Gene Symbol                       | Gene Title                                                          | p-value (group) | Fold-Change* (G21/Virgin) | Fold-Change* (PP7/G21) | Fold-Change* (PP7/Virgin) |
|-----|---------------------------------------------|-----------------------------------|---------------------------------------------------------------------|-----------------|---------------------------|------------------------|---------------------------|
| 17  | NM_130450                                   | Elovl6                            | ELOVL family member 6, elongation of long chain fatty acids (yeast) | 0.0335          | -5.41                     | 9.28                   | 1.71                      |
| 18  | NM_029600                                   | Abcc3                             | ATP-binding cassette, sub-family C (CFTR/MRP), member 3             | 0.0076          | -5.14                     | 4.42                   | -1.16                     |
| 19  | NM_172776 /// NM_177002                     | C730048C13 Rik /// D630002G06 Rik | RIKEN cDNA C730048C13 gene /// RIKEN cDNA D630002G06 gene           | 0.0304          | -5.06                     | 2.18                   | -2.33                     |
| 20  | NM_175283                                   | Srd5a1                            | steroid 5 alpha-reductase 1                                         | 0.0077          | -5.02                     | 1.72                   | -2.92                     |
| 21  | NM_001163763 /// NM_001163764 /// NM_025674 | Tcf19                             | transcription factor 19                                             | 0.0023          | -5.02                     | 2.58                   | -1.95                     |
| 22  | NM_029766                                   | Dtl                               | denticleless homolog (Drosophila)                                   | 0.0033          | -4.99                     | 2.27                   | -2.20                     |
| 23  | NM_029662                                   | Mfsd2a                            | major facilitator superfamily domain containing 2A                  | 0.0030          | -4.80                     | 1.81                   | -2.65                     |
| 24  | NM_008087                                   | Gas2                              | growth arrest specific 2                                            | 0.0078          | -4.77                     | 1.83                   | -2.61                     |
| 25  | NM_001013785                                | Akr1c19                           | aldo-keto reductase family 1, member C19                            | 0.0015          | -4.67                     | 6.73                   | 1.44                      |
| 26  | NM_134037                                   | Acly                              | ATP citrate lyase                                                   | 0.0295          | -4.66                     | 4.54                   | -1.03                     |
| 27  | NM_010720                                   | Lipg                              | lipase, endothelial                                                 | 0.0004          | -4.61                     | 4.51                   | -1.02                     |
| 28  | NM_007999                                   | Fen1                              | flap structure specific endonuclease 1                              | 0.0065          | -4.49                     | 2.34                   | -1.92                     |
| 29  | NM_009982                                   | Ctsc                              | cathepsin C                                                         | 0.0008          | -4.43                     | 1.50                   | -2.96                     |
| 30  | NM_144836                                   | Slc17a2                           | solute carrier family 17 (sodium phosphate), member 2               | 0.0253          | -4.38                     | 2.63                   | -1.66                     |
| 31  | NM_009013                                   | Rad51ap1                          | RAD51 associated protein 1                                          | 0.0332          | -4.30                     | 2.09                   | -2.06                     |
| 32  | NM_010518                                   | Igfbp5                            | insulin-like growth factor binding protein 5                        | 0.0160          | -4.25                     | 1.93                   | -2.21                     |
| 33  | NM_011284                                   | Rpa2                              | replication protein A2                                              | 0.0066          | -4.22                     | 2.05                   | -2.06                     |
| 34  | NM_024437 /// NM_024446                     | Nudt7                             | nudix (nucleoside diphosphate linked moiety X)-type motif 7         | 0.0033          | -4.05                     | 1.92                   | -2.11                     |
| 35  | NM_026014                                   | Cdt1                              | chromatin licensing and DNA replication factor 1                    | 0.0015          | -3.92                     | 2.87                   | -1.36                     |
| 36  | NM_027435                                   | Atad2                             | ATPase family, AAA domain containing 2                              | 0.0053          | -3.90                     | 2.12                   | -1.84                     |
| 37  | NM_008262                                   | Onecut1                           | one cut domain, family member 1                                     | 0.0628          | -3.77                     | 2.22                   | -1.70                     |
| 38  | NM_001081051                                | D130043K22 Rik                    | RIKEN cDNA D130043K22 gene                                          | 0.0584          | -3.46                     | 3.82                   | 1.10                      |

| No. | RefSeq Transcript ID                                                                      | Gene Symbol                  | Gene Title                                                                                                                                                                  | p-value (group) | Fold-Change* (G21/Virgin) | Fold-Change* (PP7/G21) | Fold-Change* (PP7/Virgin) |
|-----|-------------------------------------------------------------------------------------------|------------------------------|-----------------------------------------------------------------------------------------------------------------------------------------------------------------------------|-----------------|---------------------------|------------------------|---------------------------|
| 39  | NM_001162883 ///<br>NM_001168660 ///<br>NM_173743 /// NM_173786<br>/// XM_128064 /// XM_9 | Apol9a ///<br>Apol9b         | apolipoprotein L 9a /// apolipoprotein<br>L 9b                                                                                                                              | 0.0168          | -3.44                     | 2.54                   | -1.35                     |
| 40  | NM_008017                                                                                 | Smc2                         | structural maintenance of<br>chromosomes 2                                                                                                                                  | 0.0787          | -3.37                     | 2.18                   | -1.54                     |
| 41  | NM_016904                                                                                 | Cks1b                        | CDC28 protein kinase 1b                                                                                                                                                     | 0.0303          | -3.29                     | 2.21                   | -1.49                     |
| 42  | NM_175217                                                                                 | Mmd2                         | monocyte to macrophage<br>differentiation-associated 2                                                                                                                      | 0.1168          | -3.29                     | 2.16                   | -1.52                     |
| 43  | NM_008086                                                                                 | Gas1                         | growth arrest specific 1                                                                                                                                                    | 0.0066          | -3.23                     | 2.12                   | -1.52                     |
| 44  | NM_009349                                                                                 | Inmt                         | indolethylamine N-methyltransferase                                                                                                                                         | 0.0238          | -3.22                     | 1.89                   | -1.70                     |
| 45  | NM_009381                                                                                 | Thrsp                        | thyroid hormone responsive SPOT14<br>homolog (Rattus)                                                                                                                       | 0.4187          | -3.21                     | 2.92                   | -1.10                     |
| 46  | NM_001033123 ///<br>XM_194572                                                             | Gm14288                      | ethanol induced 1 /// predicted gene<br>14288                                                                                                                               | 0.0028          | -3.19                     | 1.79                   | -1.78                     |
| 47  | NM_001081643 ///<br>NM_001110784 ///<br>NM_011726 /// NM_011727<br>/// XM_001471591 /// X | Xlr3a /// Xlr3b<br>/// Xlr3c | x-linked lymphocyte-regulated protein<br>3B-like /// X-linked lymphocyte-<br>regulated 3A /// X-linked lymphocyte-<br>regulated 3B /// X-linked lymphocyte-<br>regulated 3C | 0.2732          | -3.18                     | 2.24                   | -1.42                     |
| 48  | NM_146006                                                                                 | Lss                          | lanosterol synthase                                                                                                                                                         | 0.0630          | -3.14                     | 3.36                   | 1.07                      |
| 49  | NM_054088                                                                                 | Pnpla3                       | patatin-like phospholipase domain<br>containing 3                                                                                                                           | 0.2341          | -3.12                     | 11.35                  | 3.63                      |
| 50  | NM_029720                                                                                 | Creld2                       | cysteine-rich with EGF-like domains 2                                                                                                                                       | 0.1151          | -3.07                     | 1.69                   | -1.82                     |
| 51  | NM_026282                                                                                 | Spc24                        | SPC24, NDC80 kinetochore complex<br>component, homolog (S. cerevisiae)                                                                                                      | 0.0368          | -3.06                     | 3.00                   | -1.02                     |
| 52  | NM_008568                                                                                 | Mcm7                         | minichromosome maintenance<br>deficient 7 (S. cerevisiae)                                                                                                                   | 0.0009          | -3.05                     | 1.68                   | -1.82                     |
| 53  | NM_020010                                                                                 | Cyp51                        | cytochrome P450, family 51                                                                                                                                                  | 0.1061          | -3.02                     | 2.89                   | -1.04                     |
| 54  | NM_178214                                                                                 | Hist2h2be                    | histone cluster 2, H2be                                                                                                                                                     | 0.0129          | -3.01                     | 2.78                   | -1.08                     |
| 55  | NM_001161763 ///<br>NM_001161765 ///<br>NM_010232                                         | Fmo5                         | flavin containing monooxygenase 5                                                                                                                                           | 0.0216          | -2.98                     | 1.76                   | -1.69                     |

| No. | RefSeq Transcript ID                              | Gene Symbol   | Gene Title                                                                     | p-value (group) | Fold-Change* (G21/Virgin) | Fold-Change* (PP7/G21) | Fold-Change* (PP7/Virgin) |
|-----|---------------------------------------------------|---------------|--------------------------------------------------------------------------------|-----------------|---------------------------|------------------------|---------------------------|
| 56  | NM_001039720                                      | 9030619P08Rik | RIKEN cDNA 9030619P08 gene                                                     | 0.0019          | -2.97                     | 2.27                   | -1.30                     |
| 57  | NM_010476                                         | Hsd17b7       | hydroxysteroid (17-beta) dehydrogenase 7                                       | 0.0154          | -2.95                     | 1.40                   | -2.11                     |
| 58  | NM_008321                                         | Id3           | inhibitor of DNA binding 3                                                     | 0.0306          | -2.94                     | 1.73                   | -1.70                     |
| 59  | ---                                               | BC024137      | cDNA sequence BC024137                                                         | 0.0013          | -2.93                     | 1.75                   | -1.68                     |
| 60  | NM_001033331 ///<br>NM_001079876                  | Gas2l3        | growth arrest-specific 2 like 3                                                | 0.0643          | -2.91                     | 3.49                   | 1.20                      |
| 61  | NM_019811                                         | Acss2         | acyl-CoA synthetase short-chain family member 2                                | 0.0114          | -2.90                     | 4.82                   | 1.66                      |
| 62  | NM_172769                                         | Sc5d          | sterol-C5-desaturase (fungal ERG3, delta-5-desaturase) homolog (S. cerevisiae) | 0.0052          | -2.85                     | 1.60                   | -1.78                     |
| 63  | NM_183278                                         | 2200001115Rik | RIKEN cDNA 2200001115 gene                                                     | 0.0316          | -2.81                     | 2.15                   | -1.30                     |
| 64  | NM_011172                                         | Prodh         | proline dehydrogenase                                                          | 0.0078          | -2.80                     | 2.18                   | -1.28                     |
| 65  | NM_019778 /// NM_181058                           | Zbtb20        | zinc finger and BTB domain containing 20                                       | 0.0050          | -2.75                     | 1.61                   | -1.70                     |
| 66  | NM_134469                                         | Fdps          | farnesyl diphosphate synthetase                                                | 0.1083          | -2.74                     | 3.18                   | 1.16                      |
| 67  | NM_025408                                         | Acer3         | alkaline ceramidase 3                                                          | 0.0830          | -2.73                     | 2.04                   | -1.34                     |
| 68  | NM_013831                                         | Pstpip2       | proline-serine-threonine phosphatase-interacting protein 2                     | 0.0223          | -2.72                     | 1.75                   | -1.55                     |
| 69  | NM_027852                                         | Rarres2       | retinoic acid receptor responder (tazarotene induced) 2                        | 0.0059          | -2.70                     | 1.77                   | -1.52                     |
| 70  | NM_172776                                         | D630002G06Rik | RIKEN cDNA D630002G06 gene                                                     | 0.0407          | -2.66                     | 1.77                   | -1.50                     |
| 71  | NM_009127                                         | Scd1          | stearoyl-Coenzyme A desaturase 1                                               | 0.0602          | -2.66                     | 6.30                   | 2.37                      |
| 72  | NM_028372                                         | Mblac2        | metallo-beta-lactamase domain containing 2                                     | 0.0212          | -2.65                     | 2.11                   | -1.26                     |
| 73  | NM_018738                                         | Igtp          | interferon gamma induced GTPase                                                | 0.0310          | -2.65                     | 1.74                   | -1.53                     |
| 74  | NM_172653                                         | Slc39a10      | solute carrier family 39 (zinc transporter), member 10                         | 0.0164          | -2.59                     | 2.33                   | -1.11                     |
| 75  | NM_019499                                         | Mad2l1        | MAD2 mitotic arrest deficient-like 1 (yeast)                                   | 0.1882          | -2.58                     | 2.08                   | -1.24                     |
| 76  | NM_001177625 ///<br>NM_001177626 ///<br>NM_007900 | Ect2          | ect2 oncogene                                                                  | 0.0832          | -2.58                     | 4.69                   | 1.82                      |



| No. | RefSeq Transcript ID                              | Gene Symbol       | Gene Title                                                           | p-value (group) | Fold-Change* (G21/Virgin) | Fold-Change* (PP7/G21) | Fold-Change* (PP7/Virgin) |
|-----|---------------------------------------------------|-------------------|----------------------------------------------------------------------|-----------------|---------------------------|------------------------|---------------------------|
| 77  | NM_001033606 ///<br>NM_001136222 ///<br>NM_028817 | Acsl3             | acyl-CoA synthetase long-chain family member 3                       | 0.0777          | -2.57                     | 2.23                   | -1.15                     |
| 78  | NM_001077410 ///<br>NM_212486                     | Gimap8            | GTPase, IMAP family member 8                                         | 0.0037          | -2.55                     | 2.13                   | -1.20                     |
| 79  | NM_001172055 ///<br>NM_027208                     | Bdh2              | 3-hydroxybutyrate dehydrogenase, type 2                              | 0.0059          | -2.53                     | 1.89                   | -1.34                     |
| 80  | NM_011369                                         | Shcbp1            | Shc SH2-domain binding protein 1                                     | 0.1350          | -2.53                     | 2.70                   | 1.07                      |
| 81  | NM_179203                                         | Atad3a            | ATPase family, AAA domain containing 3A                              | 0.0015          | -2.53                     | 3.38                   | 1.34                      |
| 82  | NM_030598 /// NM_207649                           | Rcan2             | regulator of calcineurin 2                                           | 0.0282          | -2.52                     | 2.56                   | 1.01                      |
| 83  | NM_146245                                         | Lrit1             | leucine-rich repeat, immunoglobulin-like and transmembrane domains 1 | 0.0108          | -2.51                     | 2.54                   | 1.01                      |
| 84  | NM_025901                                         | Polr3k            | polymerase (RNA) III (DNA directed) polypeptide K                    | 0.0055          | -2.49                     | 2.08                   | -1.20                     |
| 85  | NM_021557                                         | Rdh11             | retinol dehydrogenase 11                                             | 0.0208          | -2.48                     | 4.00                   | 1.61                      |
| 86  | ---                                               | AU015263          | expressed sequence AU015263                                          | 0.0088          | -2.48                     | 3.10                   | 1.25                      |
| 87  | NM_009193                                         | Slbp              | stem-loop binding protein                                            | 0.0009          | -2.47                     | 1.62                   | -1.52                     |
| 88  | NM_145360 /// NM_177960                           | Idi1              | isopentenyl-diphosphate delta isomerase                              | 0.1317          | -2.47                     | 2.35                   | -1.05                     |
| 89  | NM_025569                                         | Mgst3             | microsomal glutathione S-transferase 3                               | 0.0196          | -2.47                     | 2.67                   | 1.08                      |
| 90  | NM_172616                                         | C330027C09<br>Rik | RIKEN cDNA C330027C09 gene                                           | 0.2565          | -2.47                     | 3.25                   | 1.32                      |
| 91  | NM_001163587 ///<br>NM_027907                     | Agxt2l1           | alanine-glyoxylate aminotransferase 2-like 1                         | 0.0058          | -2.46                     | 3.92                   | 1.59                      |
| 92  | NM_001077353 ///<br>NM_010356                     | Gsta3             | glutathione S-transferase, alpha 3                                   | 0.0508          | -2.45                     | 1.72                   | -1.42                     |
| 93  | NM_001159543 ///<br>NM_010074                     | Dpp4              | dipeptidylpeptidase 4                                                | 0.0011          | -2.44                     | 1.96                   | -1.25                     |
| 94  | NM_145523                                         | Gca               | granulocyte colony-stimulating factor receptor 1                     | 0.0244          | -2.44                     | 2.21                   | -1.10                     |
| 95  | NM_026904                                         | Anapc10           | anaphase promoting complex subunit 10                                | 0.0414          | -2.43                     | 1.82                   | -1.33                     |

| No. | RefSeq Transcript ID                                                                      | Gene Symbol               | Gene Title                                                   | p-value (group) | Fold-Change* (G21/Virgin) | Fold-Change* (PP7/G21) | Fold-Change* (PP7/Virgin) |
|-----|-------------------------------------------------------------------------------------------|---------------------------|--------------------------------------------------------------|-----------------|---------------------------|------------------------|---------------------------|
| 96  | NM_009834 ///<br>XM_001477322                                                             | Ccm4l ///<br>LOC100047134 | CCR4 carbon catabolite repression 4-like (S. cerevisiae)     | 0.3758          | -2.42                     | 2.45                   | 1.02                      |
| 97  | NM_008303                                                                                 | Hspe1                     | heat shock protein 1 (chaperonin 10)                         | 0.0007          | -2.41                     | 1.87                   | -1.28                     |
| 98  | NM_010924                                                                                 | Nnmt                      | nicotinamide N-methyltransferase                             | 0.0895          | -2.41                     | 2.32                   | -1.04                     |
| 99  | NM_008615 ///<br>XM_001004685                                                             | LOC677317 ///<br>Me1      | malic enzyme 1, NADP(+)-dependent, cytosolic                 | 0.0326          | -2.38                     | 3.25                   | 1.37                      |
| 100 | NM_026708                                                                                 | Tlcd1                     | TLC domain containing 1                                      | 0.0535          | -2.37                     | 2.00                   | -1.18                     |
| 101 | NM_024473                                                                                 | BC005537                  | cDNA sequence BC005537                                       | 0.0145          | -2.37                     | 1.94                   | -1.22                     |
| 102 | NM_172734                                                                                 | Stk38l                    | serine/threonine kinase 38 like                              | 0.0022          | -2.36                     | 1.95                   | -1.21                     |
| 103 | NM_009831                                                                                 | Ccng1                     | cyclin G1                                                    | 0.0385          | -2.36                     | 1.64                   | -1.44                     |
| 104 | NM_009846                                                                                 | Cd24a                     | CD24a antigen                                                | 0.2108          | -2.36                     | 1.73                   | -1.36                     |
| 105 | NM_001083312 ///<br>NM_145545                                                             | Gbp6                      | guanylate binding protein 6                                  | 0.0090          | -2.35                     | 1.70                   | -1.38                     |
| 106 | NM_008317 /// NM_019750                                                                   | Hyal1 /// Nat6            | hyaluronoglucosaminidase 1 /// N-acetyltransferase 6         | 0.0666          | -2.34                     | 1.79                   | -1.31                     |
| 107 | NM_009810                                                                                 | Casp3                     | caspase 3                                                    | 0.1110          | -2.33                     | 1.34                   | -1.74                     |
| 108 | NM_010480                                                                                 | Hsp90aa1                  | heat shock protein 90, alpha (cytosolic), class A member 1   | 0.0146          | -2.33                     | 1.39                   | -1.67                     |
| 109 | NM_007792                                                                                 | Csrp2                     | cysteine and glycine-rich protein 2                          | 0.0060          | -2.31                     | 1.84                   | -1.26                     |
| 110 | NM_028984                                                                                 | 8430406I07Rik             | RIKEN cDNA 8430406I07 gene                                   | 0.0423          | -2.29                     | 1.81                   | -1.26                     |
| 111 | NM_025436                                                                                 | Sc4mol                    | sterol-C4-methyl oxidase-like                                | 0.2360          | -2.29                     | 1.90                   | -1.20                     |
| 112 | NM_009460                                                                                 | Sumo1                     | SMT3 suppressor of mif two 3 homolog 1 (yeast)               | 0.0037          | -2.29                     | 1.69                   | -1.35                     |
| 113 | NM_023523                                                                                 | Pecr                      | peroxisomal trans-2-enoyl-CoA reductase                      | 0.0076          | -2.28                     | 2.53                   | 1.11                      |
| 114 | NM_001164190 ///<br>NM_001164191 ///<br>NM_001164192 ///<br>NM_001164193 ///<br>NM_019926 | Mtm1                      | X-linked myotubular myopathy gene 1                          | 0.0000          | -2.26                     | 2.37                   | 1.05                      |
| 115 | NM_019405                                                                                 | Cetn2                     | centrin 2                                                    | 0.0159          | -2.25                     | 1.94                   | -1.16                     |
| 116 | NM_025429                                                                                 | Serpib1a                  | serine (or cysteine) peptidase inhibitor, clade B, member 1a | 0.0012          | -2.25                     | 5.21                   | 2.32                      |

| No. | RefSeq Transcript ID                  | Gene Symbol   | Gene Title                                                              | p-value (group) | Fold-Change* (G21/Virgin) | Fold-Change* (PP7/G21) | Fold-Change* (PP7/Virgin) |
|-----|---------------------------------------|---------------|-------------------------------------------------------------------------|-----------------|---------------------------|------------------------|---------------------------|
| 117 | ---                                   | 4921509J17Rik | RIKEN cDNA 4921509J17 gene /// heat shock protein 4 like                | 0.0102          | -2.25                     | 2.19                   | -1.03                     |
| 118 | NM_178890                             | Abtb2         | ankyrin repeat and BTB (POZ) domain containing 2                        | 0.0080          | -2.23                     | 2.23                   | 1.00                      |
| 119 | NM_001166635 /// NM_026524            | Mid1ip1       | Mid1 interacting protein 1 (gastrulation specific G12-like (zebrafish)) | 0.0322          | -2.22                     | 2.84                   | 1.28                      |
| 120 | NM_007934                             | Enpep         | glutamyl aminopeptidase                                                 | 0.0306          | -2.22                     | 2.29                   | 1.03                      |
| 121 | NM_001105667 /// NM_023136            | Dtymk         | deoxythymidylate kinase                                                 | 0.0020          | -2.22                     | 1.73                   | -1.28                     |
| 122 | NM_007631                             | Ccnd1         | cyclin D1                                                               | 0.0153          | -2.22                     | 2.00                   | -1.11                     |
| 123 | NM_001160345 /// NR_027704            | Svip          | small VCP/p97-interacting protein                                       | 0.0095          | -2.20                     | 1.98                   | -1.11                     |
| 124 | NM_008894                             | Pold2         | polymerase (DNA directed), delta 2, regulatory subunit                  | 0.0075          | -2.17                     | 2.13                   | -1.02                     |
| 125 | NM_153526                             | Insig1        | insulin induced gene 1                                                  | 0.0578          | -2.16                     | 2.42                   | 1.12                      |
| 126 | NM_177741                             | Ppp1r3b       | protein phosphatase 1, regulatory (inhibitor) subunit 3B                | 0.0399          | -2.16                     | 1.83                   | -1.18                     |
| 127 | NM_026784 /// NM_027348               | Pmvk          | phosphomevalonate kinase                                                | 0.0069          | -2.16                     | 3.00                   | 1.39                      |
| 128 | NM_001081195                          | Arid4a        | AT rich interactive domain 4A (RBP1-like)                               | 0.0177          | -2.15                     | 1.94                   | -1.11                     |
| 129 | NM_145392                             | Bag2          | BCL2-associated athanogene 2                                            | 0.0016          | -2.15                     | 2.27                   | 1.06                      |
| 130 | NM_013663                             | Sfrs3         | serine/arginine-rich splicing factor 3                                  | 0.0123          | -2.15                     | 1.43                   | -1.50                     |
| 131 | NM_011623                             | Top2a         | topoisomerase (DNA) II alpha                                            | 0.1417          | -2.13                     | 2.27                   | 1.06                      |
| 132 | NM_001009949                          | Mcart1        | mitochondrial carrier triple repeat 1                                   | 0.0168          | -2.13                     | 1.91                   | -1.11                     |
| 133 | NM_145462                             | Haus4         | HAUS augmin-like complex, subunit 4                                     | 0.1042          | -2.12                     | 1.70                   | -1.25                     |
| 134 | NM_026928                             | 1810014F10Rik | RIKEN cDNA 1810014F10 gene                                              | 0.0128          | -2.11                     | 1.85                   | -1.14                     |
| 135 | NM_153565                             | Pcsk9         | proprotein convertase subtilisin/kexin type 9                           | 0.3386          | -2.11                     | 2.68                   | 1.27                      |
| 136 | NM_019521                             | Gas6          | growth arrest specific 6                                                | 0.0488          | -2.10                     | 2.00                   | -1.05                     |
| 137 | NM_134256 /// XM_922697 /// XM_984546 | AB056442      | cDNA sequence AB056442                                                  | 0.0680          | -2.10                     | 1.67                   | -1.26                     |
| 138 | NM_009657                             | Aldoc         | aldolase C, fructose-bisphosphate                                       | 0.0234          | -2.10                     | 2.22                   | 1.06                      |

| No. | RefSeq Transcript ID                                         | Gene Symbol                               | Gene Title                                                                             | p-value (group) | Fold-Change* (G21/Virgin) | Fold-Change* (PP7/G21) | Fold-Change* (PP7/Virgin) |
|-----|--------------------------------------------------------------|-------------------------------------------|----------------------------------------------------------------------------------------|-----------------|---------------------------|------------------------|---------------------------|
| 139 | NM_009104                                                    | Rrm2                                      | ribonucleotide reductase M2                                                            | 0.0595          | -2.09                     | 1.84                   | -1.13                     |
| 140 | NM_027052                                                    | Slc38a4                                   | solute carrier family 38, member 4                                                     | 0.0669          | -2.08                     | 1.55                   | -1.34                     |
| 141 | NM_001177544 ///<br>NM_178185 /// NM_178188<br>/// XM_978341 | Gm11276 ///<br>Hist1h2ad ///<br>Hist1h2ao | predicted gene 11276 /// histone<br>cluster 1, H2ao                                    | 0.0930          | -2.08                     | 1.67                   | -1.25                     |
| 142 | NM_011020                                                    | Hspa4l                                    | heat shock protein 4 like                                                              | 0.0288          | -2.07                     | 1.82                   | -1.14                     |
| 143 | NM_133815                                                    | Lbr                                       | lamin B receptor                                                                       | 0.0253          | -2.07                     | 1.90                   | -1.09                     |
| 144 | NM_001002012 ///<br>NM_008301                                | Hspa2                                     | heat shock protein 2                                                                   | 0.0377          | -2.06                     | 2.63                   | 1.28                      |
| 145 | NM_027819                                                    | Ggt6                                      | gamma-glutamyltransferase 6                                                            | 0.0075          | -2.05                     | 3.82                   | 1.86                      |
| 146 | NM_178639                                                    | Sfxn5                                     | sideroflexin 5                                                                         | 0.0180          | -2.04                     | 1.94                   | -1.05                     |
| 147 | NM_021398                                                    | Slc43a3                                   | solute carrier family 43, member 3                                                     | 0.0586          | -2.04                     | 2.18                   | 1.07                      |
| 148 | NM_009900                                                    | Cicn2                                     | chloride channel 2                                                                     | 0.0171          | -2.04                     | 1.76                   | -1.16                     |
| 149 | NM_007824                                                    | Cyp7a1                                    | cytochrome P450, family 7, subfamily<br>a, polypeptide 1                               | 0.5335          | -2.03                     | 1.96                   | -1.04                     |
| 150 | NM_145942                                                    | Hmgcs1                                    | 3-hydroxy-3-methylglutaryl-<br>Coenzyme A synthase 1                                   | 0.0586          | -2.02                     | 1.80                   | -1.12                     |
| 151 | NM_023525                                                    | Cad                                       | carbamoyl-phosphate synthetase 2,<br>aspartate transcarbamylase, and<br>dihydroorotase | 0.0485          | -2.02                     | 1.90                   | -1.07                     |
| 152 | NM_009338                                                    | Acat2                                     | acetyl-Coenzyme A acetyltransferase<br>2                                               | 0.0435          | -2.02                     | 2.97                   | 1.47                      |
| 153 | NM_138656 /// NR_028354                                      | Mvd                                       | mevalonate (diphospho)<br>decarboxylase                                                | 0.1616          | -2.02                     | 5.87                   | 2.91                      |
| 154 | NM_001164223 ///<br>NM_026653                                | Rpa1                                      | replication protein A1                                                                 | 0.0024          | -2.01                     | 1.64                   | -1.23                     |
| 155 | NM_027249                                                    | Tlcd2                                     | TLC domain containing 2                                                                | 0.0121          | -1.99                     | 1.81                   | -1.10                     |
| 156 | NM_175382                                                    | Fam72a                                    | family with sequence similarity 72,<br>member A                                        | 0.2023          | -1.98                     | 2.11                   | 1.07                      |
| 157 | NM_153525                                                    | Tmem41b                                   | transmembrane protein 41B                                                              | 0.0397          | -1.98                     | 1.51                   | -1.31                     |
| 158 | NM_009320                                                    | Slc6a6                                    | solute carrier family 6<br>(neurotransmitter transporter,<br>taurine), member 6        | 0.0648          | -1.97                     | 1.94                   | -1.01                     |
| 159 | NM_153573                                                    | Fkbp14                                    | FK506 binding protein 14                                                               | 0.0046          | -1.96                     | 2.32                   | 1.18                      |

| No. | RefSeq Transcript ID                                                  | Gene Symbol | Gene Title                                                       | p-value (group) | Fold-Change* (G21/Virgin) | Fold-Change* (PP7/G21) | Fold-Change* (PP7/Virgin) |
|-----|-----------------------------------------------------------------------|-------------|------------------------------------------------------------------|-----------------|---------------------------|------------------------|---------------------------|
| 160 | NM_008395                                                             | Itch        | itchy, E3 ubiquitin protein ligase                               | 0.1157          | -1.96                     | 2.05                   | 1.04                      |
| 161 | NM_025558                                                             | Cyb5b       | cytochrome b5 type B                                             | 0.0555          | -1.96                     | 2.22                   | 1.14                      |
| 162 | NM_138651                                                             | Cds2        | CDP-diacylglycerol synthase (phosphatidate cytidyltransferase) 2 | 0.0029          | -1.95                     | 2.01                   | 1.03                      |
| 163 | NM_009270                                                             | Sqle        | squalene epoxidase                                               | 0.2242          | -1.95                     | 2.84                   | 1.46                      |
| 164 | NM_001145831 ///<br>NM_001145832 ///<br>NM_010631                     | Kifc3       | kinesin family member C3                                         | 0.0058          | -1.95                     | 1.79                   | -1.09                     |
| 165 | NM_027406                                                             | Aldh11l1    | aldehyde dehydrogenase 1 family, member L1                       | 0.0030          | -1.95                     | 2.16                   | 1.11                      |
| 166 | NM_010219                                                             | Fkbp4       | FK506 binding protein 4                                          | 0.0451          | -1.92                     | 1.60                   | -1.20                     |
| 167 | NM_009425                                                             | Tnfsf10     | tumor necrosis factor (ligand) superfamily, member 10            | 0.0414          | -1.92                     | 2.00                   | 1.04                      |
| 168 | NM_001122647 ///<br>XM_001472055                                      | Mup10       | major urinary protein 10                                         | 0.0188          | -1.91                     | 1.66                   | -1.15                     |
| 169 | NM_001113326 ///<br>NM_031195                                         | Msr1        | macrophage scavenger receptor 1                                  | 0.1168          | -1.91                     | 1.27                   | -1.51                     |
| 170 | NM_016672                                                             | Ddc         | dopa decarboxylase                                               | 0.0086          | -1.90                     | 3.25                   | 1.71                      |
| 171 | NM_009801                                                             | Car2        | carbonic anhydrase 2                                             | 0.0219          | -1.90                     | 1.95                   | 1.03                      |
| 172 | NM_001163239 ///<br>NM_001163241 ///<br>NM_001163242 ///<br>NM_020282 | Nqo2        | NAD(P)H dehydrogenase, quinone 2                                 | 0.0829          | -1.90                     | 1.74                   | -1.09                     |
| 173 | NM_007988                                                             | Fasn        | fatty acid synthase                                              | 0.0369          | -1.88                     | 4.29                   | 2.28                      |
| 174 | NM_001043322 ///<br>NM_010230                                         | Fmn1        | formin 1                                                         | 0.0212          | -1.88                     | 2.31                   | 1.23                      |
| 175 | NM_133786                                                             | Smc4        | structural maintenance of chromosomes 4                          | 0.3404          | -1.88                     | 1.38                   | -1.37                     |
| 176 | NM_011480                                                             | Srebf1      | sterol regulatory element binding transcription factor 1         | 0.0781          | -1.88                     | 1.94                   | 1.03                      |
| 177 | XM_895068                                                             | Gdap10      | ganglioside-induced differentiation-associated-protein 10        | 0.2736          | -1.87                     | 1.83                   | -1.02                     |
| 178 | NM_007659                                                             | Cdk1        | cyclin-dependent kinase 1                                        | 0.3055          | -1.86                     | 2.00                   | 1.07                      |

| No. | RefSeq Transcript ID                                                                         | Gene Symbol         | Gene Title                                                                            | p-value (group) | Fold-Change* (G21/Virgin) | Fold-Change* (PP7/G21) | Fold-Change* (PP7/Virgin) |
|-----|----------------------------------------------------------------------------------------------|---------------------|---------------------------------------------------------------------------------------|-----------------|---------------------------|------------------------|---------------------------|
| 179 | NM_001033166 ///<br>NM_001037279                                                             | 2700094K13R<br>ik   | RIKEN cDNA 2700094K13 gene                                                            | 0.1394          | -1.85                     | 2.07                   | 1.11                      |
| 180 | NM_011638                                                                                    | Tfrc                | transferrin receptor                                                                  | 0.0736          | -1.84                     | 4.02                   | 2.18                      |
| 181 | NM_023665                                                                                    | D4Wsu53e            | DNA segment, Chr 4, Wayne State University 53, expressed                              | 0.0860          | -1.84                     | 1.90                   | 1.03                      |
| 182 | NM_001163577 ///<br>NM_001163578 ///<br>NM_001163581 ///<br>NM_001163582 ///<br>NM_001163583 | Prom1               | prominin 1                                                                            | 0.0118          | -1.83                     | 5.80                   | 3.16                      |
| 183 | NM_016750 /// XR_031328<br>/// XR_033615                                                     | Gm6722 ///<br>H2afz | H2A histone family, member Z ///<br>hypothetical LOC100504949                         | 0.0113          | -1.83                     | 2.10                   | 1.15                      |
| 184 | NM_007780                                                                                    | Csf2rb              | colony stimulating factor 2 receptor, beta, low-affinity (granulocyte-macrophage)     | 0.0114          | -1.83                     | 2.35                   | 1.28                      |
| 185 | NM_008379                                                                                    | Kpnb1               | karyopherin (importin) beta 1                                                         | 0.0133          | -1.83                     | -1.03                  | -1.88                     |
| 186 | NM_029103                                                                                    | Manf                | mesencephalic astrocyte-derived neurotrophic factor                                   | 0.1484          | -1.83                     | 1.66                   | -1.10                     |
| 187 | NM_001080129 ///<br>NM_001080130 ///<br>NM_001080131 ///<br>NM_001080132 ///<br>NM_001080134 | Tmpo                | thymopoietin                                                                          | 0.0300          | -1.82                     | 1.72                   | -1.06                     |
| 188 | NM_001033264                                                                                 | Gls2                | glutaminase 2 (liver, mitochondrial)                                                  | 0.0042          | -1.82                     | 2.15                   | 1.18                      |
| 189 | NM_011796                                                                                    | Capn10              | calpain 10                                                                            | 0.0047          | -1.82                     | 2.16                   | 1.18                      |
| 190 | NM_001113560 ///<br>NM_025374                                                                | Glo1                | glyoxalase 1                                                                          | 0.0149          | -1.82                     | 1.63                   | -1.12                     |
| 191 | NM_145614                                                                                    | Dlat                | dihydrolipoamide S-acetyltransferase (E2 component of pyruvate dehydrogenase complex) | 0.0143          | -1.81                     | 1.90                   | 1.05                      |
| 192 | NM_133933                                                                                    | Rpn1                | ribophorin I                                                                          | 0.0555          | -1.81                     | 1.75                   | -1.04                     |

| No. | RefSeq Transcript ID                              | Gene Symbol   | Gene Title                                              | p-value (group) | Fold-Change* (G21/Virgin) | Fold-Change* (PP7/G21) | Fold-Change* (PP7/Virgin) |
|-----|---------------------------------------------------|---------------|---------------------------------------------------------|-----------------|---------------------------|------------------------|---------------------------|
| 193 | NM_001103177 ///<br>NM_001103178 ///<br>NM_178688 | Ablim1        | actin-binding LIM protein 1                             | 0.0065          | -1.80                     | 1.92                   | 1.06                      |
| 194 | NM_026845                                         | Ppil1         | peptidylprolyl isomerase (cyclophilin)-like 1           | 0.0001          | -1.79                     | 2.14                   | 1.19                      |
| 195 | NM_177382                                         | Cyp2r1        | cytochrome P450, family 2, subfamily r, polypeptide 1   | 0.0136          | -1.78                     | 1.99                   | 1.12                      |
| 196 | NM_172951                                         | Sntg2         | syntrophin, gamma 2                                     | 0.0184          | -1.78                     | 1.76                   | -1.01                     |
| 197 | NM_153557                                         | BC029214      | cDNA sequence BC029214                                  | 0.0069          | -1.78                     | 2.66                   | 1.49                      |
| 198 | NM_133774                                         | Stard4        | StAR-related lipid transfer (START) domain containing 4 | 0.0737          | -1.78                     | 1.58                   | -1.13                     |
| 199 | NM_028179                                         | 2200002D01Rik | RIKEN cDNA 2200002D01 gene                              | 0.0155          | -1.78                     | 2.26                   | 1.27                      |
| 200 | NM_001164572 ///<br>NM_133741                     | Snrk          | SNF related kinase                                      | 0.0146          | -1.78                     | 1.66                   | -1.07                     |
| 201 | NM_001145947 ///<br>NM_011792                     | Bace1         | beta-site APP cleaving enzyme 1                         | 0.3426          | -1.77                     | 1.74                   | -1.02                     |
| 202 | NM_133362                                         | Erdr1         | erythroid differentiation regulator 1                   | 0.0497          | -1.76                     | 1.89                   | 1.07                      |
| 203 | NM_025522                                         | Dhrs7         | dehydrogenase/reductase (SDR family) member 7           | 0.0040          | -1.76                     | 1.73                   | -1.02                     |
| 204 | NM_001081176                                      | Polr3g        | polymerase (RNA) III (DNA directed) polypeptide G       | 0.0219          | -1.75                     | 1.82                   | 1.04                      |
| 205 | NM_017477 /// NM_201244                           | Copg          | coatamer protein complex, subunit gamma                 | 0.0049          | -1.75                     | 1.72                   | -1.02                     |
| 206 | NM_172772                                         | Fam63b        | family with sequence similarity 63, member B            | 0.0576          | -1.74                     | 1.79                   | 1.03                      |
| 207 | NM_025868                                         | Tmx2          | thioredoxin-related transmembrane protein 2             | 0.0024          | -1.74                     | 1.99                   | 1.14                      |
| 208 | NM_134147                                         | Macrod1       | MACRO domain containing 1                               | 0.0082          | -1.72                     | 1.65                   | -1.04                     |
| 209 | NM_172665                                         | Pdk1          | pyruvate dehydrogenase kinase, isoenzyme 1              | 0.0402          | -1.72                     | 1.83                   | 1.07                      |
| 210 | NM_198937                                         | Hn1l          | hematological and neurological expressed 1-like         | 0.0003          | -1.71                     | 1.78                   | 1.04                      |
| 211 | NM_178758                                         | Acsm5         | acyl-CoA synthetase medium-chain family member 5        | 0.0267          | -1.70                     | 1.94                   | 1.15                      |
| 212 | NM_011542                                         | Tcea3         | transcription elongation factor A (SII), 3              | 0.0019          | -1.69                     | 2.07                   | 1.22                      |
| 213 | NM_133960                                         | Ces6          | carboxylesterase 6                                      | 0.0033          | -1.69                     | 2.21                   | 1.31                      |

| No. | RefSeq Transcript ID                        | Gene Symbol                 | Gene Title                                                                                    | p-value (group) | Fold-Change* (G21/Virgin) | Fold-Change* (PP7/G21) | Fold-Change* (PP7/Virgin) |
|-----|---------------------------------------------|-----------------------------|-----------------------------------------------------------------------------------------------|-----------------|---------------------------|------------------------|---------------------------|
| 214 | NM_001164441 ///<br>NM_026153 /// NM_027496 | Ankrd33b                    | ankyrin repeat domain 33B                                                                     | 0.0410          | -1.68                     | 1.94                   | 1.16                      |
| 215 | NM_011850                                   | Nr0b2                       | nuclear receptor subfamily 0, group B, member 2                                               | 0.6932          | -1.68                     | 1.65                   | -1.02                     |
| 216 | NM_133806 /// XM_917484                     | LOC640502 ///<br>Uap1       | UDP-N-acetylhexosamine pyrophosphorylase-like /// UDP-N-acetylglucosamine pyrophosphorylase 1 | 0.0180          | -1.68                     | 1.52                   | -1.10                     |
| 217 | NM_010191                                   | Fdft1                       | farnesyl diphosphate farnesyl transferase 1                                                   | 0.1275          | -1.67                     | 2.18                   | 1.30                      |
| 218 | NM_009466                                   | Ugdh                        | UDP-glucose dehydrogenase                                                                     | 0.0042          | -1.67                     | 3.53                   | 2.11                      |
| 219 | NM_027570                                   | Ldhd                        | lactate dehydrogenase D                                                                       | 0.0152          | -1.67                     | 1.82                   | 1.09                      |
| 220 | NM_019479                                   | Hes6                        | hairy and enhancer of split 6 (Drosophila)                                                    | 0.1347          | -1.66                     | 2.66                   | 1.60                      |
| 221 | NM_011805 /// NM_175551<br>/// NM_177852    | Dido1                       | death inducer-obliterator 1                                                                   | 0.0333          | -1.66                     | 1.64                   | -1.01                     |
| 222 | NM_009113                                   | S100a13                     | S100 calcium binding protein A13                                                              | 0.0740          | -1.65                     | 1.81                   | 1.09                      |
| 223 | NM_019787 ///<br>XM_001481049               | LOC10004872<br>6 /// Sec23b | SEC23B (S. cerevisiae)                                                                        | 0.0603          | -1.65                     | 1.72                   | 1.05                      |
| 224 | NM_001163290 ///<br>NM_023341               | Cabc1                       | chaperone, ABC1 activity of bc1 complex like (S. pombe)                                       | 0.1030          | -1.64                     | 2.13                   | 1.30                      |
| 225 | NM_153783 /// XR_033107<br>/// XR_035669    | Gm10307 ///<br>Paox         | polyamine oxidase (exo-N4-amino)                                                              | 0.0079          | -1.62                     | 1.86                   | 1.14                      |
| 226 | NM_009721                                   | Atp1b1                      | ATPase, Na <sup>+</sup> /K <sup>+</sup> transporting, beta 1 polypeptide                      | 0.0109          | -1.61                     | 1.87                   | 1.16                      |
| 227 | NM_001033536                                | Rfx7                        | regulatory factor X, 7                                                                        | 0.0303          | -1.61                     | 1.69                   | 1.05                      |
| 228 | NM_139269                                   | Pla2g16                     | phospholipase A2, group XVI                                                                   | 0.0026          | -1.61                     | 1.62                   | 1.01                      |
| 229 | NM_146230                                   | Acaa1b                      | acetyl-Coenzyme A acyltransferase 1B                                                          | 0.2947          | -1.61                     | 1.61                   | -1.00                     |
| 230 | NM_021455                                   | Mlxipl                      | MLX interacting protein-like                                                                  | 0.0054          | -1.61                     | 2.48                   | 1.54                      |



| No. | RefSeq Transcript ID                                                  | Gene Symbol | Gene Title                                  | p-value (group) | Fold-Change* (G21/Virgin) | Fold-Change* (PP7/G21) | Fold-Change* (PP7/Virgin) |
|-----|-----------------------------------------------------------------------|-------------|---------------------------------------------|-----------------|---------------------------|------------------------|---------------------------|
| 231 | NM_001080127 ///<br>NM_001080128 ///<br>NM_009070                     | Rnps1       | ribonucleic acid binding protein S1         | 0.0046          | -1.60                     | 1.81                   | 1.13                      |
| 232 | NM_001168475 ///<br>NM_001168476 ///<br>NM_001168477 ///<br>NM_025905 | Ttc23       | tetratricopeptide repeat domain 23          | 0.1676          | -1.60                     | 1.64                   | 1.03                      |
| 233 | NM_010941                                                             | Nsdhl       | NAD(P) dependent steroid dehydrogenase-like | 0.1839          | -1.59                     | 1.83                   | 1.15                      |
| 234 | NM_007856                                                             | Dhcr7       | 7-dehydrocholesterol reductase              | 0.0272          | -1.58                     | 2.57                   | 1.63                      |
| 235 | NM_013778                                                             | Akr1c13     | aldo-keto reductase family 1, member C13    | 0.0027          | -1.58                     | 1.66                   | 1.05                      |
| 236 | NM_001081169                                                          | Aspg        | asparaginase homolog (S. cerevisiae)        | 0.0266          | -1.56                     | 2.04                   | 1.30                      |
| 237 | NM_133768                                                             | Asl         | argininosuccinate lyase                     | 0.0180          | -1.56                     | 1.67                   | 1.07                      |
| 238 | NM_007494                                                             | Ass1        | argininosuccinate synthetase 1              | 0.0498          | -1.55                     | 1.57                   | 1.01                      |
| 239 | NM_008439                                                             | Khk         | ketohexokinase                              | 0.0358          | -1.52                     | 1.85                   | 1.22                      |
